# Supplementary material
Source: PubMed Central journal article supplement (PMC4786452)
Supplement: NIHMS746338-supplement-Supplemental_Material.pdf [file NIHMS746338-supplement-Supplemental_Material.pdf]

## SUPPLEMENTARY MATERIALS

### Table of Contents

|                                                                                                                                                                                                                       | <b>Page</b> |
|-----------------------------------------------------------------------------------------------------------------------------------------------------------------------------------------------------------------------|-------------|
| 1. Section 1. Derivation and validation of treatment scores                                                                                                                                                           | 2           |
| 2. Section 2. Multiple imputation of missing treatment information                                                                                                                                                    | 9           |
| 3. Figure S1. Cumulative all-cause, recurrence/progression and health-related cause late mortality among five-year survivors of childhood cancer by decade for specific childhood cancer diagnoses.                   | 13          |
| 4. Figure S2. Among five-year survivors, (A) percentage receiving radiotherapy and (B) mean cumulative dose of anthracycline chemotherapy by decade and by primary cancer diagnosis.                                  | 17          |
| 5. Figure S3. Among five-year survivors, box plots providing median cumulative anthracycline dose along with 25 <sup>th</sup> and 75 <sup>th</sup> percentiles by decade and by primary cancer diagnosis.             | 18          |
| 6. Table S1. Demographic and treatment characteristics by treatment era and life status of five-year survivors of childhood cancer                                                                                    | 20          |
| 7. Table S2. Distribution of treatment exposure for acute lymphoblastic leukemia, Hodgkin lymphoma, Wilms tumor and astrocytoma across three decades                                                                  | 22          |
| 8. Table S3. Cumulative incidence of all-cause, recurrence/progression, and health-related cause late mortality at 15 years from primary cancer diagnosis                                                             | 24          |
| 9. Table S4. Frequencies of underlying cause of death in five-year survivors of childhood cancer                                                                                                                      | 26          |
| 10. Table S5. Relative rates for mortality among five-year survivors of childhood cancer                                                                                                                              | 45          |
| 11. Table S6. All-cause and cause-specific standard mortality ratios in five-year survivors of childhood cancer followed for 15 years                                                                                 | 46          |
| 12. Table S7. Relative rates of Other Health-Related Cause Mortality Based on Treatment Era Among Five-Year Survivors of Specific Childhood Cancers and the Impact of Specific Treatment Exposures Upon Treatment Era | 47          |
| 13. Table S8. Cumulative incidence of all cause and cause-specific mortality at <b>10 years</b> from primary cancer diagnosis among five-year survivors                                                               | 48          |

## Section 1: Derivation and validation of treatment scores

### A. The motivation for and concept of treatment scores

Treatment scores were derived as a way of quantifying treatment-associated propensity for late mortality (from health-related causes other than recurrence/progression of the initial cancer) based on the therapeutic exposures that CCSS survivors received for their childhood cancer. Our intention was to augment the formal regression-based inference with a descriptive visualization of data. That is, this summary score permits a graphical evaluation of data with respect to whether, and how much, treatment-associated propensity for late mortality has declined over time (box plots in Figure 2 within the manuscript), potentially paralleling the temporal reduction in late mortality (exemplified by the red dots in Figure 2).

For example, for certain primary cancer diagnoses, we hypothesized that historical changes (reductions) in treatment exposure over the three decades would result in appreciable reductions in the treatment-related propensity for late mortality (box plots), parallel to the reductions of actual late mortality rates (red dots). Graphing these quantities comparatively allowed visualization of evidence that the treatment changes over time are associated with reduced risk of late mortality. On the other hand, in some childhood cancer types, there may be little change in the treatment-related propensity for late mortality, possibly because no major treatment changes have taken place and/or treatment changes have not resulted in the reduction of propensity for late mortality. Among survivors of such childhood cancer diagnoses, a decline in rates of late mortality over time would suggest that something other than their childhood cancer treatment has contributed to the established reduction in late mortality (e.g., effective follow-up screening or care of severe chronic conditions).

The methodologies used for deriving, validating, and applying the summary treatment score are described in detail below.

### B. The derivation of treatment scores

A set of treatment variables that were considered to potentially contribute to the treatment-associated propensity for late mortality were a priori selected for each of the four childhood cancer types where statistically significant reduction in late mortality (from health-related causes) was identified (i.e., Acute Lymphoblastic Leukemia, Astrocytoma, Hodgkin Lymphoma, and Wilms Tumor). Treatment variables were categorized based on clinical relevance by the investigator team. They included:

- Acute Lymphoblastic Leukemia

|                                     |                                                                     |
|-------------------------------------|---------------------------------------------------------------------|
| Cranial radiation (Gy)              | None, (>0, 19), 20 or greater                                       |
| Anthracyclines (mg/m <sup>2</sup> ) | None, (>0, 149), (150, 299), (300, 449), (450, 599), 600 or greater |
| Epipodophyllotoxin                  | None, Any                                                           |
| Steroid                             | None, Prednisone, Dexamethasone, Both                               |

- Astrocytoma

|                   |           |
|-------------------|-----------|
| Cranial radiation | None, Any |
| Chemotherapy      | None, Any |
- Hodgkin Lymphoma

|                                         |                                                                                                    |
|-----------------------------------------|----------------------------------------------------------------------------------------------------|
| Chest radiation (Gy)                    | None, (>0, 19), (20, 29), 30 or greater                                                            |
| Anthracyclines (mg/m <sup>2</sup> )     | None, (>0, 149), (150, 299), (300, 449),<br>(450, 599), 600 or greater                             |
| Alkylating agents* (mg/m <sup>2</sup> ) | None, (>0, 3999), (4000, 7999), (8000, 11999),<br>(12000, 15999), (16000, 19999), 20000 or greater |
| Splenectomy                             | No, Yes                                                                                            |
- Wilms Tumor

|                                     |                                                                        |
|-------------------------------------|------------------------------------------------------------------------|
| Abdomen radiation (Gy)              | None, (>0, 19), (20, 29), 30 or greater                                |
| Anthracyclines (mg/m <sup>2</sup> ) | None, (>0, 149), (150, 299), (300, 449),<br>(450, 599), 600 or greater |

\*Cyclophosphamide Equivalent Dose<sup>1</sup>

The treatment score model was developed using multivariable piecewise exponential models with late mortality (from health-related causes other than recurrence/progression of the initial cancer) as the outcome. For each childhood cancer diagnosis group, we fitted the model with logarithm of person years at risk as an offset (the person years at risk were terminated at death or censoring). The model was of the form:

$$\log (E[Y_{ij}]) = \log (PY_{ij}) + Z_{ij}\alpha + X_i\beta$$

where, for the  $i^{\text{th}}$  survivor in the  $j^{\text{th}}$  year of attained age,  $Y_{ij}$  is the Poisson random variable indicating alive/death status,  $PY_{ij}$  is the person years at risk observed (during the  $j^{\text{th}}$  year of attained age),  $Z_{ij}$  is the vector of adjustment variables (age at diagnosis, sex, and attained age in  $j^{\text{th}}$  year),  $X_i$  is the vector of the diagnosis-specific fixed set of treatment variables described above that the survivor received, and  $\alpha$  and  $\beta$  are model parameters. The baseline log mortality rate was modeled by a natural cubic spline function of the attained age in  $Z_{ij}\alpha$  with five knots placed at 10, 20, 30, 40, 45 years old.

*The treatment score for a given survivor refers to the estimated partial linear predictor  $X_i\hat{\beta}$  of health-related late mortality from the treatment portion of the model, i.e., estimated log rate of death, corresponding to the specific set of treatments the survivor has received ( $X_i$ ), adjusted for age at diagnosis, sex, and attained age.*

### *C. The validation of treatment scores*

*To validate the treatment score as a summary scale that measures the propensity for late mortality, we performed an internal validation by splitting the contributing CCSS treatment institutions into two groups by stratified random sampling, and used one group of CCSS institutions for developing the treatment score and the other group for validating it. Specifically, the CCSS institutions were stratified based on their membership to the Pediatric Oncology Group or Children’s Cancer Group (the primary legacy treatment consortia to the Children’s Oncology Group for the eras in which this analysis takes place) and their patient volumes (approximated by the numbers of CCSS survivors contributed to the cohort). Within each stratum, the institutions were randomly split into the two groups. St. Jude Children’s Research Hospital, the largest CCSS institution, was the only exception where the survivors were randomly split into the two groups within the institution.*

*Note that the treatment score was not developed for the purpose of predicting individual survivors’ deaths. Thus, our validation was not concerned with the score’s predictive power for individual survivors’ deaths. Rather, we are interested in determining the degree to which stratum defined by treatment scores correlate with mortality risks. We therefore focused our validation of the treatment score’s utility on calibration of the treatment-associated propensity for late mortality. Our approach was similar to the methods used for validation of risk calibration for the most widely-used breast cancer risk prediction model developed by Gail et al<sup>2-4</sup> and for other risk scores of clinical utility.<sup>5,6</sup>*

*Specifically, using one of the two groups of CCSS institutions as the “training dataset”, we fitted a treatment score model as described in the previous section. Note that we employed the multiple imputation methodology for missing treatment information, which created 10 complete training datasets. Thus, we fitted the same treatment score model to each of the 10 training datasets and averaged the resulting  $\beta$  parameter estimates to obtain a single trained treatment score model. Using this trained model, the treatment score  $X_i\hat{\beta}$  was calculated for each survivor of the training institutions based on his/her treatment exposures  $X_i$ . We defined treatment score groups by dividing the training institutions’ survivors of each childhood cancer type into three groups for Acute Lymphoblastic Leukemia and Hodgkin Lymphoma, where the counts of late mortality from health-related causes were sufficiently large, and two groups for Astrocytoma and Wilms Tumor. The highest treatment score group was defined by a cutoff that approximately placed survivors with the top 20% of treatment scores within each childhood cancer diagnosis group. For Acute Lymphoblastic Leukemia and Hodgkin Lymphoma, the remaining survivors were approximately equally split into two groups by a cutoff of the treatment score (each 40% of the diagnosis*

specific training set). For Astrocytoma, due to having only two binary treatment factors in the model, the cutoff placed approximately half of the survivors in the higher score group.

Using the fixed  $\beta$  parameter estimates from the training model, the treatment scores  $X_i\hat{\beta}$ 's were also calculated for survivors from the other group of CCSS institutions: these institutions and survivors served as the "validation dataset". Then, they were also grouped into the two or three treatment score groups using the same cutoff values as the training dataset/institutions.

The table below shows the validation results of the treatment score with respect to the calibration.<sup>2-6</sup> Rates of each treatment score group agree well between the survivors of the training institutions and those of the independent validation institutions. This validates the calibration capacity of the treatment score. In addition, we calculated cumulative incidence of late mortality from health-related causes by the training/validation status for each childhood cancer diagnosis group. While cumulative incidence of cause-specific mortality has competing risks and even a perfect calibration would not make it equal between the training and validation institutions, the figure below shows reasonably good agreement, further supporting the utility of the treatment score.

Observed rates of late mortality from health-related causes per 10,000 person years in training and validation institutions by treatment score group and childhood cancer type.

| Childhood Cancer Type        | Group      | Treatment Score Groups<br>(rates per 10,000 person-years) |             |           |
|------------------------------|------------|-----------------------------------------------------------|-------------|-----------|
|                              |            | Low risk                                                  | Medium risk | High risk |
| Acute Lymphoblastic Leukemia | Training   | 8.3                                                       | 22.6        | 48.1      |
|                              | Validation | 8.1                                                       | 20.1        | 44.2      |
| Hodgkin Lymphoma             | Training   | 21.5                                                      | 56.4        | 89.7      |
|                              | Validation | 27.1                                                      | 58.1        | 125.3     |
|                              |            | Low risk                                                  | High risk   |           |
| Wilms Tumor                  | Training   | 7.3                                                       |             | 37.3      |
|                              | Validation | 11.5                                                      |             | 43.3      |
| Astrocytoma                  | Training   | 16.9                                                      |             | 55.3      |
|                              | Validation | 17.3                                                      |             | 53.1      |

Cumulative incidence of late mortality from health-related causes by the training/validation status for each childhood cancer diagnosis group: (A) Acute Lymphoblastic Leukemia; (B) Hodgkin Lymphoma; (C) Wilms Tumor; and (D) Astrocytoma. Black, blue, and red lines are the low-, medium-, and high-risk groups, respectively.

### [A] Acute lymphoblastic leukemia

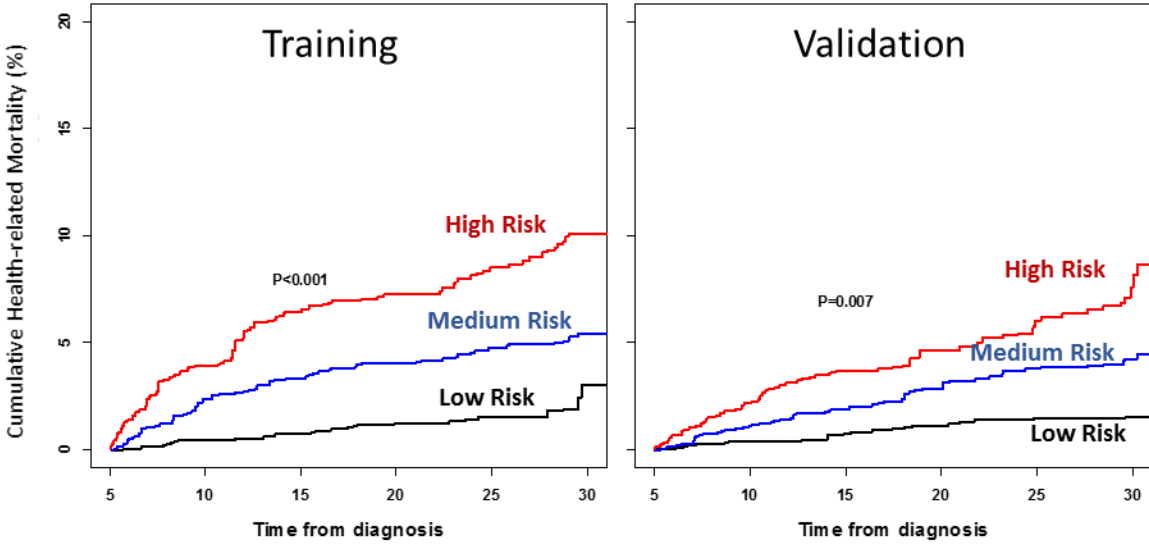

### [B] Hodgkin lymphoma

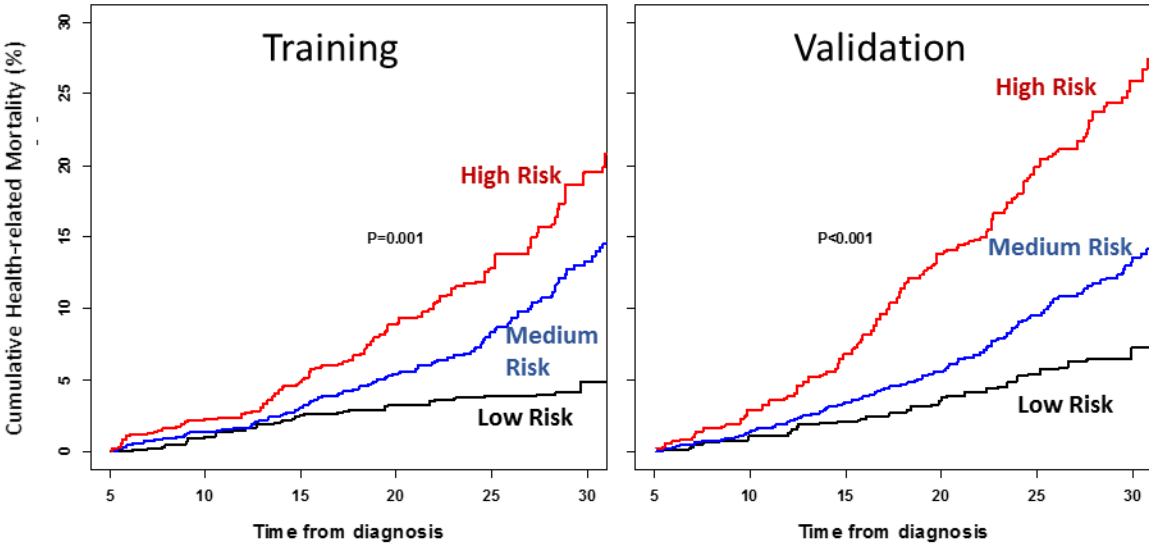

### [C] Wilms tumor

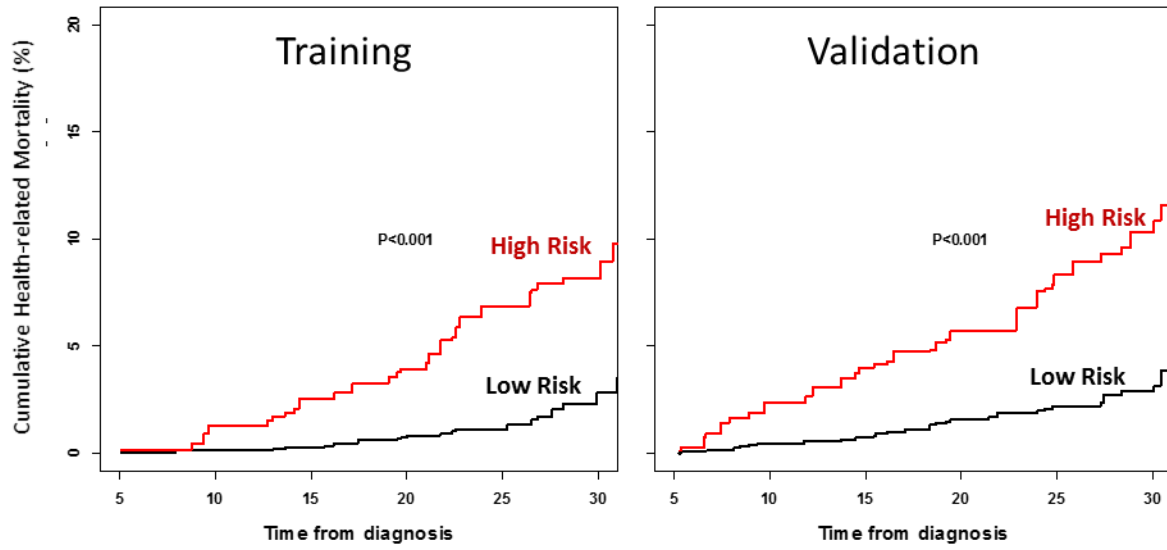

### [D] Astrocytoma

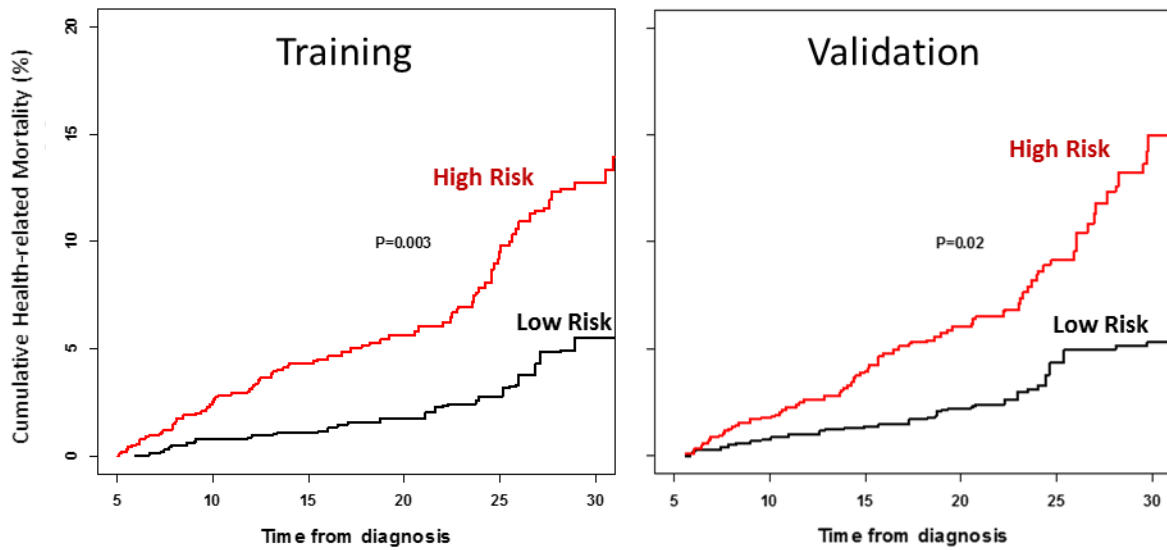

*These results validate the derived treatment score as a measure that summarizes treatment-associated propensity for late mortality.*

#### *D. The application of treatment scores*

*The validated treatment scores were standardized within each childhood cancer diagnosis group in order to enhance their interpretability with respect to changes over time. Specifically, we standardized the treatment scores such that those from 1970-1979 had a mean of 0.0 and standard deviation of 1.0 within each childhood cancer diagnosis group. If another time period of survivors (e.g., those from 1980-1989) had a tendency to have negative/similar/positive values of the standardized treatment score, then that would indicate a decrease/no change/increase in treatment-related propensity for late mortality as compared to 1970-1979.*

#### *E. References for Section 1*

- 1. Green DM, Nolan VG, Goodman PJ, Whitton JA, Srivastava D, Leisenring WM, Neglia JP, Sklar CA, Kaste SC, Hudson MM, Diller LR, Stovall M, Donaldson SS, Robison LL. The cyclophosphamide equivalent dose as an approach for quantifying alkylating agent exposure: a report from the Childhood Cancer Survivor Study. *Pediatr Blood Cancer*. 2014 Jan;61(1):53-67.*
- 2. Costantino JP, Gail MH, Pee D, Anderson S, Redmond CK, Benichou J, Wieand HS. Validation studies for models projecting the risk of invasive and total breast cancer incidence. *J Natl Cancer Inst*. 1999 Sep 15;91(18):1541-8.*
- 3. Bondy ML, Lustbader ED, Halabi S, Ross E, Vogel VG. Validation of a breast cancer risk assessment model in women with a positive family history. *J Natl Cancer Inst*. 1994 Apr 20;86(8):620-5.*
- 4. Spiegelman D, Colditz GA, Hunter D, Hertzmark E. Validation of the Gail et al. model for predicting individual breast cancer risk. *J Natl Cancer Inst*. 1994 Apr 20;86(8):600-7.*
- 5. Rassi A Jr, Rassi A, Little WC, Xavier SS, Rassi SG, Rassi AG, Rassi GG, Hasslocher-Moreno A, Sousa AS, Scanavacca MI. Development and validation of a risk score for predicting death in Chagas' heart disease. *N Engl J Med*. 2006 Aug 24;355(8):799-808.*
- 6. DeFilippis AP, Young R, Carrubba CJ, McEvoy JW, Budoff MJ, Blumenthal RS, Kronmal RA, McClelland RL, Nasir K, Blaha MJ. An analysis of calibration and discrimination among multiple cardiovascular risk scores in a modern multiethnic cohort. *Ann Intern Med*. 2015 Feb 17;162(4):266-75.*



## Section 2: Multiple imputation of missing treatment information

This section describes the issue of missing treatment information in our analysis of late mortality and our multiple imputation approach.<sup>1</sup>

### A. The issue of missing treatment information

Treatment information is not complete for a subset of study-eligible survivors in CCSS. This is due to a variety of reasons including: not being able to contact survivors for study recruitment (unsuccessful tracing); passive and active refusal of study participation; participation in the study without consenting to release medical record information; and incomplete treatment records at the treating institutions (primarily partial missing information on some treatment variables).

The table below shows the extent of incomplete/missing treatment information in all study-eligible survivors of each diagnosis group for which multiple imputation was used. The percentages of study-eligible survivors with complete treatment information varied from 74% in Astrocytoma to 56% in Hodgkin Lymphoma. Approximately one quarter of survivors in each diagnosis group had treatment information completely missing due to either unsuccessful tracing for study recruitment, passive/active refusal of study participation, or study participation without consenting to release medical record information. The remaining study-eligible survivors had partially missing treatment information with the majority consisting of only one missing treatment variable.

| <i>Incompleteness of treatment data by diagnosis group</i> |                                               |                              |                                   |                              |
|------------------------------------------------------------|-----------------------------------------------|------------------------------|-----------------------------------|------------------------------|
| <i>Completeness of treatment data</i>                      | <i>Acute Lymphoblastic Leukemia (N=8,500)</i> | <i>Astrocytoma (N=3,904)</i> | <i>Hodgkin Lymphoma (N=4,332)</i> | <i>Wilms Tumor (N=3,055)</i> |
| <i>Complete</i>                                            | 5,637 (66.3%)                                 | 2,883 (73.8%)                | 2,421 (55.9%)                     | 2,090 (68.4%)                |
| <i>Missing</i>                                             | 2,185 (25.7%)                                 | 909 (23.3%)                  | 1,079 (24.9%)                     | 705 (23.1%)                  |
| <i>Partial missing [1 variable missing]</i>                | 678 (8.0%)<br>[583 (6.9%)]                    | 112 (2.9%)<br>[112 (2.9%)]   | 832 (19.2%)<br>[642 (14.8%)]      | 260 (8.5%)<br>[260 (8.5%)]   |

For our late mortality analyses, the outcome (late mortality) data are available for all study-eligible survivors (except Canadian survivors) through the National Death Index, regardless of whether survivors participated in CCSS or not. This complete ascertainment of the outcome variable provides an exceptional opportunity for analyses free of any participation bias. Thus, some of the analyses in this paper that did not use treatment information (e.g., Tables 1 and 2, Figure 1 within the manuscript) were based on the entire study-eligible cohort and free of any participation bias. For the other analyses that utilized treatment information (e.g., Table 3 and Figure 2 within the manuscript), we still used all study-eligible survivors by addressing missing treatment information by a multiple imputation approach, motivated by a special context that applies to pediatric cancer treatment described below.

## *B. The special context of childhood cancer treatment*

*The CCSS cohort is hospital-based, consisting of institutions with a long-standing history of specializing in the diagnosis and treatment of children/adolescents with cancer. During the period covered by the CCSS cohort (1970-1999), the great majority of childhood cancer patients seen at CCSS institutions were treated on clinical trial protocols. While some deviations from protocols can take place and some patients may be treated off protocols, treatments a patient receives are largely determined by the protocol the patient is on, or a prior/similar protocol that applies to the patient. Protocols are specific to given childhood cancer diagnoses and, for some diagnoses, they are also specific to patients of certain ages. Given the rare nature of pediatric malignancies, the National Cancer Institute established cooperative clinical trials groups. Pediatric oncologists and other subspecialists involved in the treatment of childhood cancers, have since the 1960s collaborated at a national level to design and conduct protocol-driven clinical trials, while only a select few large pediatric oncology institutions (e.g., St. Jude Children's Research Hospital, Memorial Sloan Kettering Cancer Center, Dana Farber Cancer Center) develop/use their own institution-specific protocols for selected cancer diagnoses. Protocols are modified in successive trials aiming for improvement over current protocols, and therefore evolve over time.*

*Because of this special context of childhood cancer treatment, the combination of the following 4 variables is strongly indicative of what protocol a survivor might have been treated on and provides an excellent proxy metric for the survivor's treatment exposures: (a) childhood cancer type; (b) institution the survivor was treated at (informing the institution's membership to a specific cooperative oncology consortium; i.e., Children's Oncology Group and its legacy groups consisting of the Pediatric Oncology Group, Children's Cancer Group, National Wilms Tumor Study Group, Intergroup Rhabdomyosarcoma Study Group, Intergroup Ewings Sarcoma Group; or whether it is an institution that develops its own protocols); (c) age at diagnosis; and (d) year of diagnosis. This special context of pediatric oncology, together with the availability of both the outcome and these four variables on the full study-eligible cohort, provides us with an effective analytic approach for addressing missing treatment information through multiple imputation.*

## *C. The multiple imputation approach*

*We make an assumption of "missing at random",<sup>1,2</sup> i.e., conditioned on observed data, whether treatment data of a survivor are missing/incomplete or not does not depend on true (missing/incomplete) treatment itself the survivor had received. This assumption implies that, stratified by the observed data of survivors, the conditional distribution of treatment data within each stratum is equal between survivors with complete treatment information and those without.<sup>1,2</sup> While we cannot assess whether the missing at random assumption holds or not directly using the observed data alone, our previous analysis<sup>3</sup> with an additional aggregate set of data is consistent with, and supports, this assumption. Specifically, we had collected treatment data of study-eligible non-participants of CCSS in an aggregate form for group comparisons without allowing linkages to individual survivors. We compared participants and study-eligible non-participants of the CCSS study with respect to survivors' demographic and clinical characteristics including treatment modality. This comparison revealed no statistically significant difference between the two groups, in spite of their large sample sizes, in any characteristics including treatment modality, with an exception of vital status. Thus, we felt reasonably*

*assured to make the missing at random assumption in our analyses, that is, within each stratum formed by the key characteristics (the vital status and the four key variables (a)-(d) above that inform on treatment protocols), all of which are available on the full study-eligible cohort, we assume that missing/incomplete treatment data are due to chance alone.*

*Under the missing at random assumption, the following multiple imputation approach we employed provides valid statistical inference. For a given survivor with incomplete treatment information, we borrow sets of actual treatments from 10 survivors randomly selected from a pool of survivors with complete treatment information who match with the survivor in question on the key characteristics above. The 10 sets of treatments reflect the range and uncertainty of plausible sets of treatments the survivor in question had received based on the key characteristics. This is a hot-deck imputation method<sup>4</sup> and we applied Approximate Bayesian Bootstrap to make it properly reflect the entire uncertainty associated with missing data.<sup>2,5</sup> Specifically, for each survivor in question, we first bootstrapped the pool of the matched survivors with complete treatment information and then applied the hot-deck imputation above to draw 10 samples by simple random sampling with replacement from the bootstrapped matched pool. This approach is “proper” in the sense of reflect the entire uncertainty<sup>1,2</sup> and preserves the combination structures of various treatments that are actually used in clinical practice, i.e., imputation is multivariate. This results in 10 complete datasets are then analyzed one by one with an identical statistical method (e.g., piecewise exponential regression) whose results are expected to differ to some degree depending on the range and uncertainty captured across the 10 imputations. A specific standard statistical method<sup>1,2</sup> is used to summarize and provide a single set of results from the 10 sets of results accounting for the uncertainty of each quantity of interest (e.g., a parameter) within each of, and between, the 10 analyses.*

*The key characteristics on which a pool of survivors with complete treatment information were matched with a survivor with incomplete treatment information depended on the degree of the incompleteness. If a survivor was missing all treatment information, the key characteristics to match were the 4 variables (a)-(d) and the vital status. If a survivor was missing partial treatment information, we additionally matched on all available treatment variables.*

#### *D. Sensitivity analysis assessing impact of the imputation*

*We employed the multiple imputation to reduce potential bias and more properly reflect the level of uncertainties associated with the incomplete treatment data. We conducted a sensitivity analysis using only survivors with complete treatment information, with a caveat that this complete-data-only analysis is potentially biased.<sup>1,2</sup>*

*The table below shows results from Table 3 in the manuscript with and without imputation. While individual parameter estimates of relative rates associated with treatment era are slightly different, their overall direction and magnitude of change when therapy is included in the model remained unchanged in each diagnosis group in the complete-data-only analysis. Thus, our main result of Table 3 (described at the end of Results section of the manuscript) is robust with respect to our use of the multiple imputation.*

Relative rates of health-related cause mortality based on treatment era among five-year survivors of specific childhood cancers and the impact of specific treatment exposures on treatment era, based on survivors with complete treatment information using the complete-data-only analysis.\*

|                              | Acute Lymphoblastic Leukemia |               | Hodgkin Lymphoma  |               | Wilms Tumor       |               | Astrocytoma       |               |
|------------------------------|------------------------------|---------------|-------------------|---------------|-------------------|---------------|-------------------|---------------|
|                              | RR                           | 95%CI         | RR                | 95%CI         | RR                | 95%CI         | RR                | 95%CI         |
| <b>Model Without Therapy</b> |                              |               |                   |               |                   |               |                   |               |
| Treatment era                | 0.94                         | 0.86 – 1.02   | 0.81              | 0.74 - 0.90   | 0.72              | 0.58 - 0.89   | 0.85              | 0.76 - 0.96   |
| [Table 3 with imputation]    | [0.88]                       | [0.81 – 0.95] | [0.79]            | [0.72 – 0.87] | [0.68]            | [0.56 – 0.84] | [0.81]            | [0.73 – 0.91] |
| <b>Model With Therapy</b>    |                              |               |                   |               |                   |               |                   |               |
| Treatment era                | 1.10 <sup>1</sup>            | 0.94 - 1.28   | 0.79 <sup>2</sup> | 0.68 - 0.91   | 0.97 <sup>3</sup> | 0.66 - 1.40   | 0.85 <sup>4</sup> | 0.72 – 1.00   |
| [Table 3 with imputation]    | [1.02]                       | [0.83 – 1.24] | [0.79]            | [0.70 – 0.89] | [0.80]            | [0.59 – 1.08] | [0.82]            | [0.72 – 0.94] |

\*all models adjusted for sex, age at diagnosis and attained age, <sup>1</sup>Adjusted for cranial RT dose, anthracycline dose, epipodophyllotoxin and steroid exposure, <sup>2</sup>adjusted for chest-directed radiotherapy dose, anthracycline dose, cyclophosphamide equivalent dose and splenectomy, <sup>3</sup>adjusted for abdominal RT dose and anthracycline dose, <sup>4</sup>adjusted for cranial RT dose and any chemotherapy (yes/no).

## E. References for Section 2

1. Little RJA, Rubin DB. *Statistical Analysis with Missing Data*, 2<sup>nd</sup> Edition. 2002. New York, John Wiley & Sons.
2. Molenberghs G., Fitzmaurice G., Kenward M.G., Tsiatis A., and Verbeke G. *Handbook of missing data methodology*. 2015. New-York: Chapman and Hall/CRC.
3. Robison LL, Mertens AC, Boice JD, Breslow NE, Donaldson SS, Green DM, Li FP, Meadows AT, Mulvihill JJ, Neglia JP, Nesbit ME, Packer RJ, Potter JD, Sklar CA, Smith MA, Stovall M, Strong LC, Yasui Y, Zeltzer LK. Study design and cohort characteristics of the Childhood Cancer Survivor Study: a multi-institutional collaborative project. *Med Pediatr Oncol*. 2002 Apr;38(4):229-39.
4. Andridge RR, Little RJA. A Review of Hot Deck Imputation for Survey Non-response. *International statistical review*. 2010;78(1):40-64.
5. Rubin DB, Schenker N. Multiple imputation for interval estimation from simple random samples with ignorable non-response. *J Amer Stat Assoc*. 1986;81:366–374.

**Figure 1.** Cumulative all-cause, recurrence/progression and health-related cause late mortality among five-year survivors of childhood cancer by decade for specific childhood cancers

**All Cause                                          Recurrence/Progression                                          Health-Related Cause**

**Acute lymphoblastic leukemia (n=8,500)**

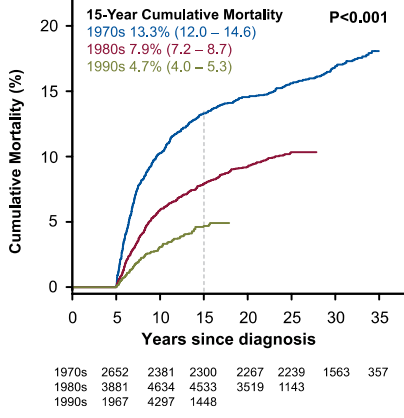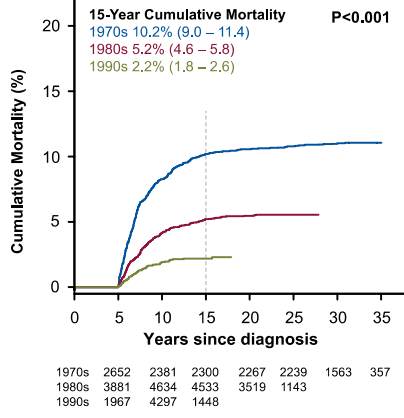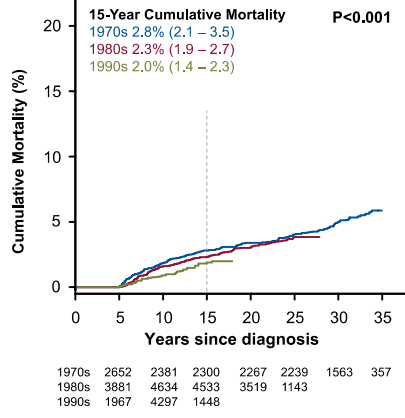

**Hodgkin lymphoma (n=4,332)**

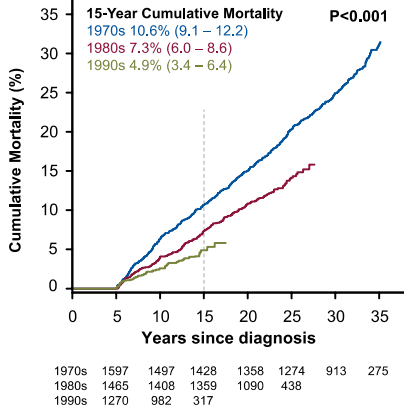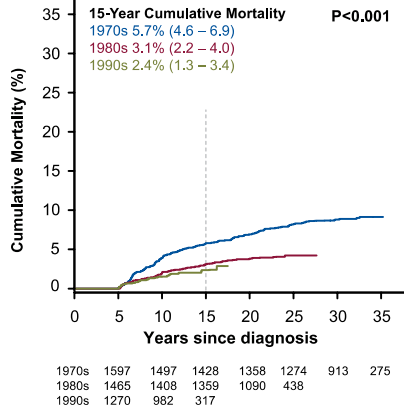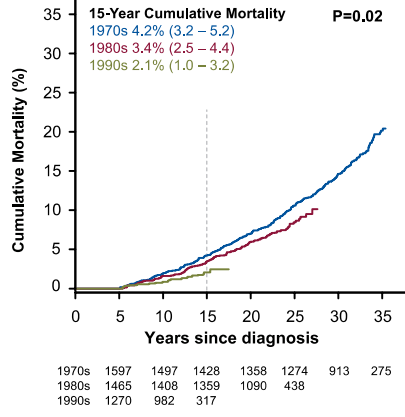

**Non-Hodgkin lymphoma (n=2,837)**

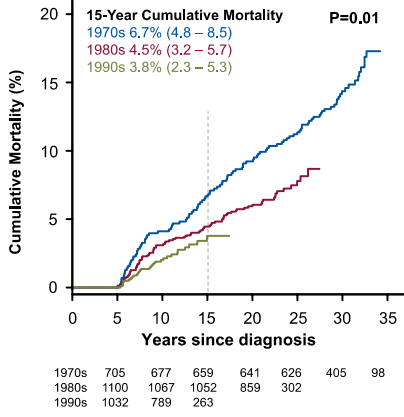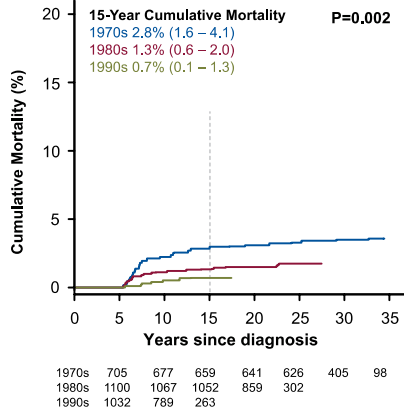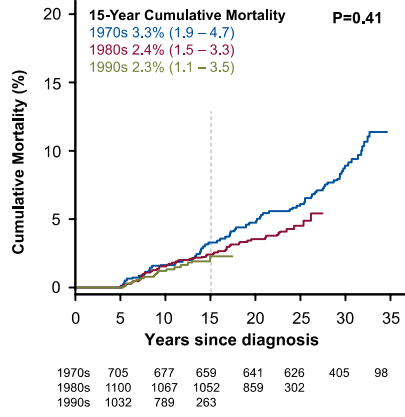

**All Cause                      Recurrence/Progression                      Health-Related Cause**

**Wilms tumors (n=3,055)**

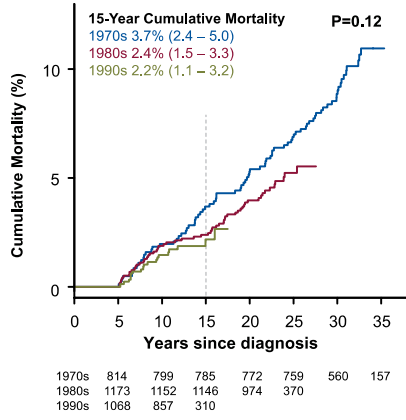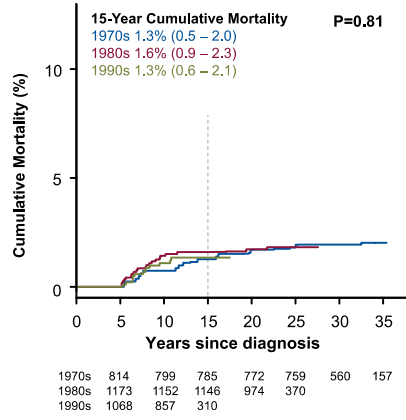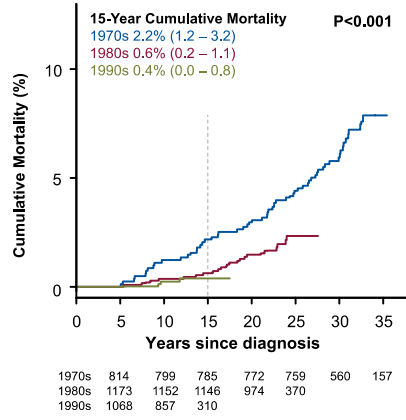

**Astrocytomas (n=3,904)**

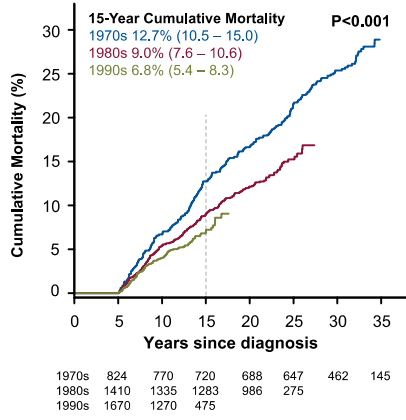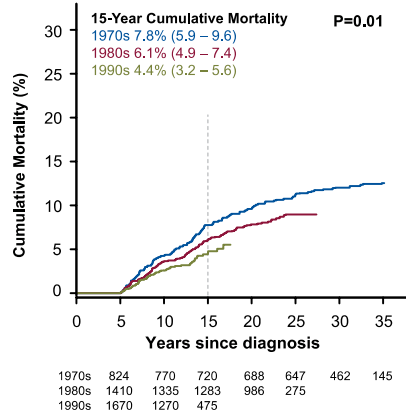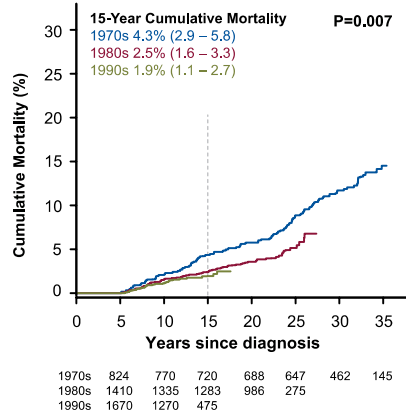

**Neuroblastoma (n=2,632)**

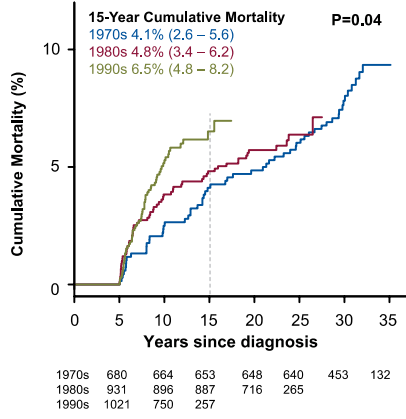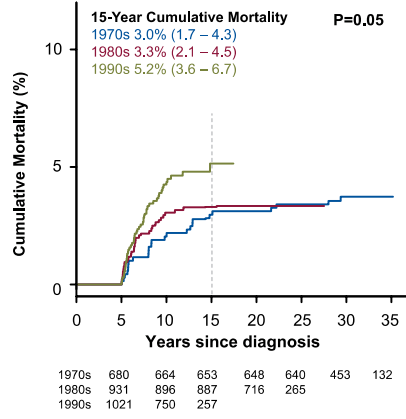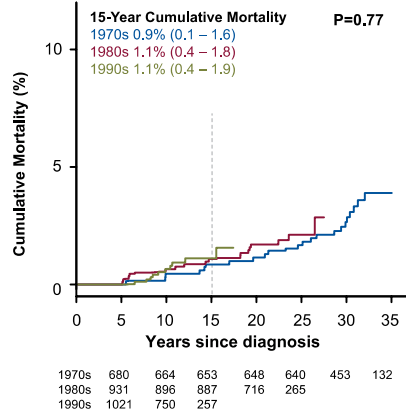

**All Cause                                          Recurrence/Progression                                          Health-Related Cause**

**Rhabdomyosarcoma (n=1,679)**

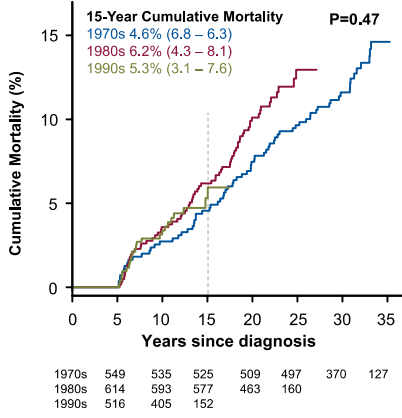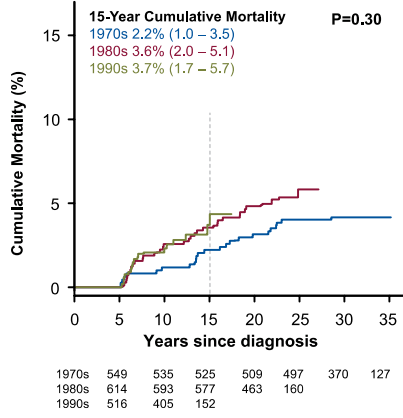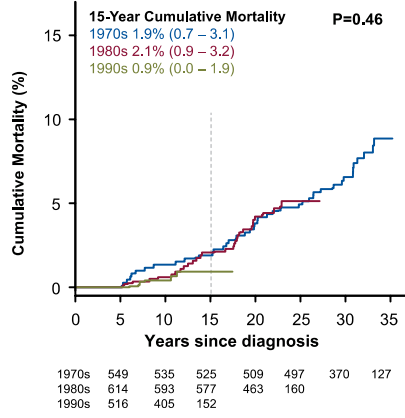

**All Bone tumors (n=2,930)**

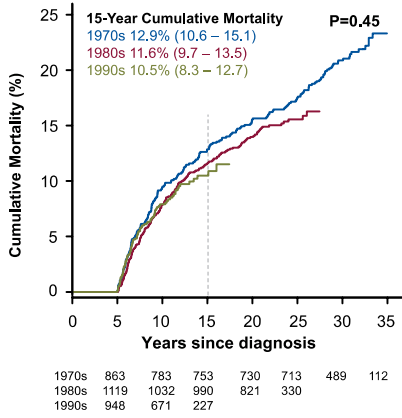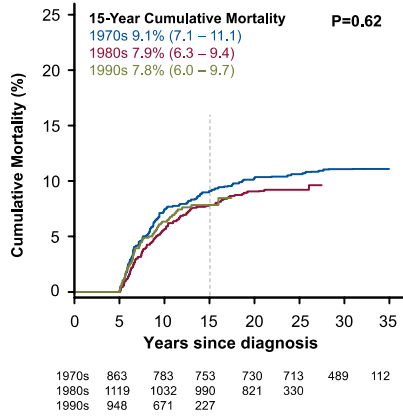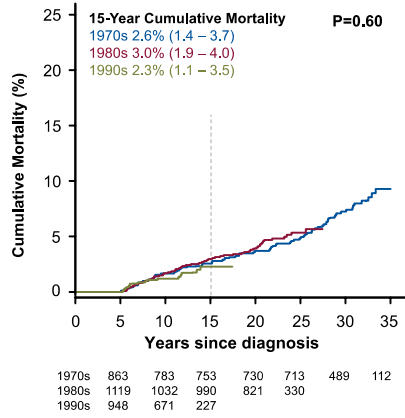



**Figure S2.** Among five-year survivors, (A) percentage receiving radiotherapy and (B) mean cumulative dose of anthracycline chemotherapy by decade and by primary cancer diagnosis.

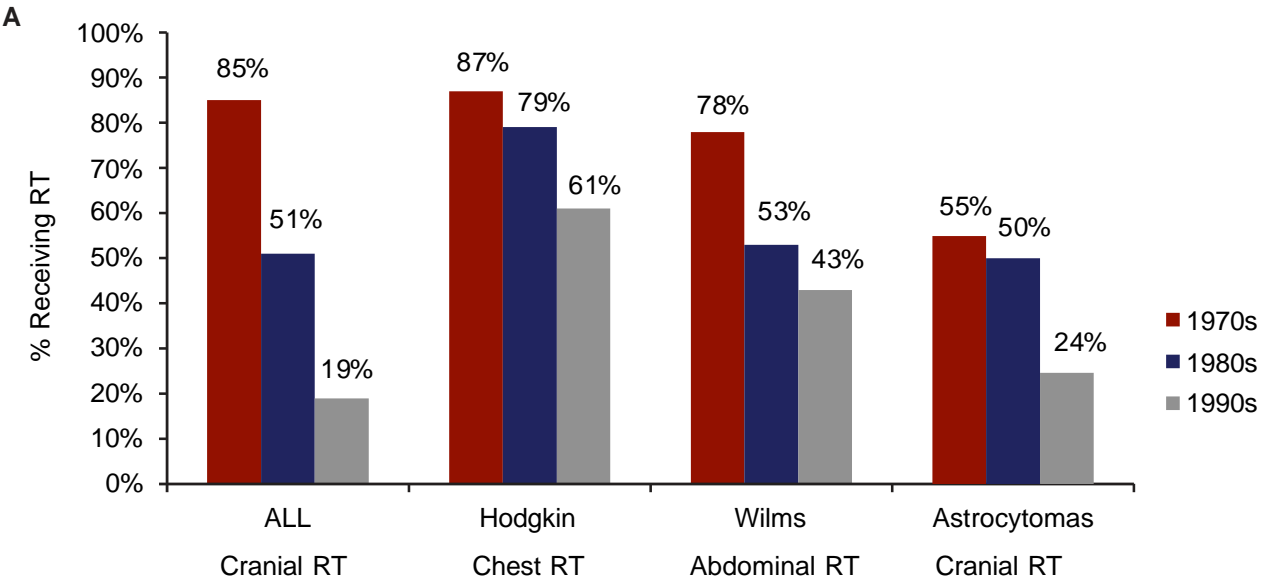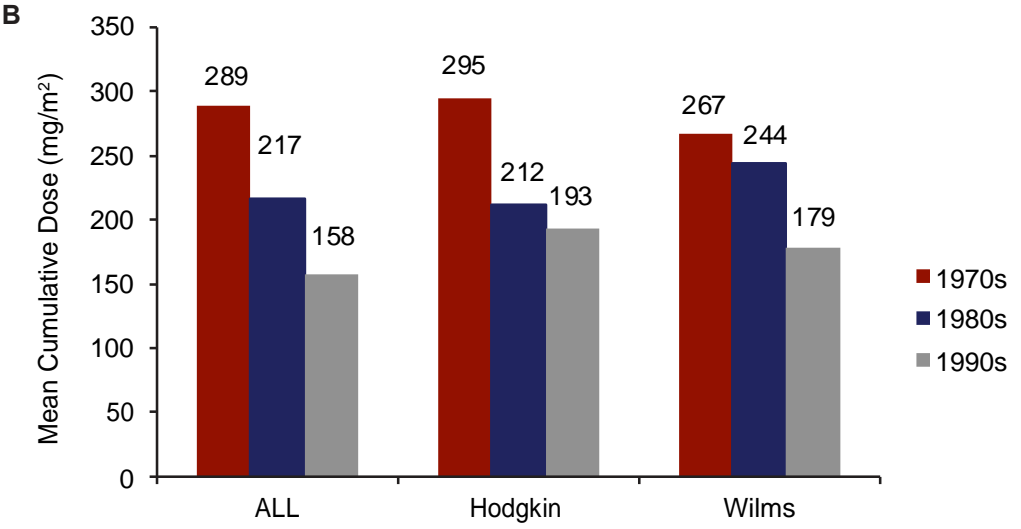

**Figure S3.** Among five-year survivors, box plots providing median cumulative anthracycline dose along with 25<sup>th</sup> and 75<sup>th</sup> percentiles by decade and by primary cancer diagnosis.

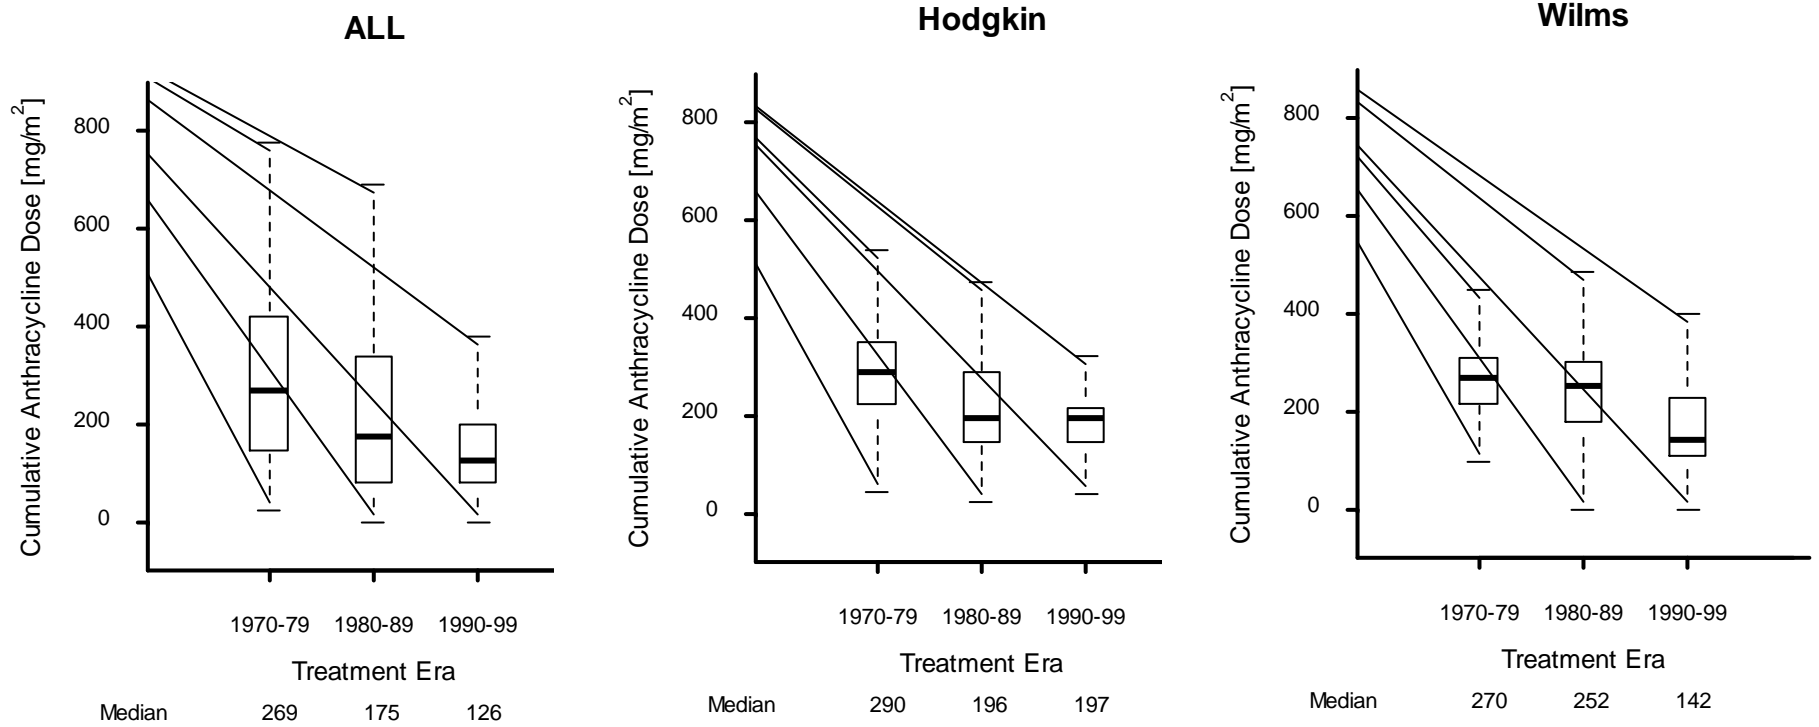



Table S1. Demographic and treatment characteristics by treatment era and life status of five-year survivors of childhood cancer

|                                       | Total         | 1970-1979    | 1980-1989     | 1990-1999    | Alive         | Dead         |
|---------------------------------------|---------------|--------------|---------------|--------------|---------------|--------------|
| All Survivors*                        | 34033         | 9416         | 13181         | 11436        | 30075         | 3958         |
| Sex                                   |               |              |               |              |               |              |
| Male                                  | 18983 (55.8%) | 5198 (55.2%) | 7354 (55.8%)  | 6431 (56.2%) | 16628 (55.3%) | 2355 (59.5%) |
| Female                                | 15050 (44.2%) | 4218 (44.8%) | 5827 (44.2%)  | 5005 (43.8%) | 13447 (44.7%) | 1603 (40.5%) |
| Race/Ethnicity                        |               |              |               |              |               |              |
| Non-Hispanic white                    | 21781 (64.0%) | 5628 (59.8%) | 8332 (63.2%)  | 7821 (68.4%) | 19575 (65.1%) | 2206 (55.7%) |
| Non-Hispanic black                    | 2022 (5.9%)   | 242 (2.6%)   | 658 (5.0%)    | 1122 (9.8%)  | 1817 (6.0%)   | 205 (5.2%)   |
| Hispanic                              | 2287 (6.7%)   | 296 (3.1%)   | 688 (5.2%)    | 1303 (11.4%) | 2094 (7.0%)   | 193 (4.9%)   |
| Others                                | 2057 (6.0%)   | 161 (1.7%)   | 706 (5.4%)    | 1190 (10.4%) | 1849 (6.1%)   | 208 (5.3%)   |
| Unknown                               | 5886 (17.3%)  | 3089 (32.8%) | 2797 (21.2%)  | 0 (0.0%)     | 4740 (15.8%)  | 1146 (28.9%) |
| Age at Diagnosis (years)              |               |              |               |              |               |              |
| 0-4                                   | 13463 (39.6%) | 3660 (38.9%) | 5468 (41.5%)  | 4335 (37.9%) | 12319 (41.0%) | 1144 (28.9%) |
| 5-9                                   | 7826 (23.0%)  | 2204 (23.4%) | 2993 (22.7%)  | 2629 (23.0%) | 6950 (23.1%)  | 876 (22.1%)  |
| 10-14                                 | 7144 (21.0%)  | 1903 (20.2%) | 2670 (20.3%)  | 2571 (22.5%) | 6185 (20.6%)  | 959 (24.2%)  |
| 15-20                                 | 5600 (16.5%)  | 1649 (17.5%) | 2050 (15.6%)  | 1901 (16.6%) | 4621 (15.4%)  | 979 (24.8%)  |
| Survival after diagnosis (years)      |               |              |               |              |               |              |
| 5-9                                   | 4210 (12.4%)  | 695 (7.4%)   | 716 (5.4%)    | 2799 (24.5%) | 2349 (7.8%)   | 1861 (47.0%) |
| 10-14                                 | 6298 (18.5%)  | 316 (3.4%)   | 323 (2.5%)    | 5659 (49.5%) | 5523 (18.4%)  | 775 (19.6%)  |
| 15-19                                 | 5285 (15.5%)  | 224 (2.4%)   | 2083 (15.8%)  | 2978 (26.0%) | 4758 (15.8%)  | 527 (13.3%)  |
| 20-24                                 | 6721 (19.8%)  | 240 (2.5%)   | 6481 (49.2%)  | 0 (0.0%)     | 6343 (21.1%)  | 378 (9.5%)   |
| 25-29                                 | 5964 (17.5%)  | 2386 (25.3%) | 3578 (27.1%)  | 0 (0.0%)     | 5692 (18.9%)  | 272 (6.9%)   |
| 30-34                                 | 4051 (11.9%)  | 4051 (43.0%) | 0 (0.0%)      | 0 (0.0%)     | 3924 (13.0%)  | 127 (3.2%)   |
| ≥35                                   | 1504 (4.4%)   | 1504 (16.0%) | 0 (0.0%)      | 0 (0.0%)     | 1486 (4.9%)   | 18 (0.5%)    |
| Diagnosis                             |               |              |               |              |               |              |
| Leukemia                              | 10199 (30.0%) | 2982 (31.7%) | 4485 (34.0%)  | 2732 (23.9%) | 9019 (30.0%)  | 1180 (29.8%) |
| Acute lymphoblastic leukemia          | 8500 (25.0%)  | 2652 (28.2%) | 3881 (29.4%)  | 1967 (17.2%) | 7557 (25.1%)  | 943 (23.8%)  |
| Acute myeloid leukemia                | 1222 (3.6%)   | 196 (2.1%)   | 438 (3.3%)    | 588 (5.1%)   | 1101 (3.7%)   | 121 (3.1%)   |
| Other leukemia                        | 477 (1.4%)    | 134 (1.4%)   | 166 (1.3%)    | 177 (1.5%)   | 361 (1.2%)    | 116 (3.0%)   |
| Hodgkin lymphoma                      | 4332 (12.7%)  | 1597 (17.0%) | 1465 (11.1%)  | 1270 (11.1%) | 3647 (12.1%)  | 685 (17.3%)  |
| Non-Hodgkin lymphoma                  | 2837 (8.3%)   | 705 (7.5%)   | 1100 (8.3%)   | 1032 (9.0%)  | 2621 (8.7%)   | 216 (5.5%)   |
| CNS tumors                            | 6369 (18.7%)  | 1225 (13.0%) | 2294 (17.4%)  | 2850 (24.9%) | 5443 (18.1%)  | 926 (23.4%)  |
| Astrocytoma                           | 3904 (11.5%)  | 824 (8.8%)   | 1410 (10.7%)  | 1670 (14.6%) | 3383 (11.2%)  | 521 (13.2%)  |
| Medulloblastoma, PNET                 | 1380 (4.1%)   | 227 (2.4%)   | 493 (3.7%)    | 660 (5.8%)   | 1133 (3.8%)   | 247 (6.2%)   |
| Other CNS                             | 1085 (3.2%)   | 174 (1.8%)   | 391 (3.0%)    | 520 (4.5%)   | 927 (3.1%)    | 158 (4.0%)   |
| Wilms tumor                           | 3055 (9.0%)   | 814 (8.6%)   | 1173 (8.9%)   | 1068 (9.3%)  | 2898 (9.6%)   | 157 (4.0%)   |
| Neuroblastoma                         | 2632 (7.7%)   | 680 (7.2%)   | 931 (7.1%)    | 1021 (8.9%)  | 2457 (8.2%)   | 175 (4.4%)   |
| Rhabdomyosarcoma                      | 1679 (4.9%)   | 549 (5.8%)   | 614 (4.7%)    | 516 (4.5%)   | 1510 (5.0%)   | 169 (4.3%)   |
| Bone tumors                           | 2930 (8.6%)   | 864 (9.2%)   | 1119 (8.5%)   | 947 (8.3%)   | 2480 (8.2%)   | 450 (11.4%)  |
| Ewing sarcoma                         | 997 (2.9%)    | 279 (3.0%)   | 381 (2.9%)    | 337 (2.9%)   | 813 (2.7%)    | 184 (4.6%)   |
| Osteosarcoma                          | 1771 (5.2%)   | 539 (5.7%)   | 683 (5.2%)    | 549 (4.8%)   | 1518 (5.0%)   | 253 (6.4%)   |
| Other bone tumors                     | 162 (0.5%)    | 46 (0.5%)    | 55 (0.4%)     | 61 (0.5%)    | 149 (0.5%)    | 13 (0.3%)    |
| Treatment exposure                    |               |              |               |              |               |              |
| Any radiation                         |               |              |               |              |               |              |
| Yes                                   | 19455 (57.2%) | 7213 (76.6%) | 7587 (57.6%)  | 4656 (40.7%) | 16366 (54.4%) | 3089 (78.0%) |
| No                                    | 14578 (42.8%) | 2203 (23.4%) | 5594 (42.4%)  | 6780 (59.3%) | 13708 (45.6%) | 870 (22.0%)  |
| Chest radiation                       |               |              |               |              |               |              |
| Yes                                   | 8299 (24.4%)  | 3073 (32.6%) | 3062 (23.2%)  | 2163 (18.9%) | 6715 (22.3%)  | 1584 (40.0%) |
| No                                    | 25734 (75.6%) | 6343 (67.4%) | 10119 (76.8%) | 9273 (81.1%) | 23360 (77.7%) | 2375 (60.0%) |
| Chest radiation dose                  |               |              |               |              |               |              |
| None                                  | 25734 (75.6%) | 6343 (67.4%) | 10119 (76.8%) | 9273 (81.1%) | 23360 (77.7%) | 2375 (60.0%) |
| ≥1-<20Gy                              | 2230 (6.6%)   | 518 (5.5%)   | 965 (7.3%)    | 748 (6.5%)   | 1888 (6.3%)   | 342 (8.6%)   |
| ≥20-<30Gy                             | 2189 (6.4%)   | 765 (8.1%)   | 679 (5.2%)    | 745 (6.5%)   | 1899 (6.3%)   | 290 (7.3%)   |
| ≥30Gy                                 | 3879 (11.4%)  | 1790 (19.0%) | 1419 (10.8%)  | 671 (5.9%)   | 2928 (9.7%)   | 951 (24.0%)  |
| Central nervous system radiation      |               |              |               |              |               |              |
| Yes                                   | 10185 (29.9%) | 3655 (38.8%) | 4344 (33.0%)  | 2186 (19.1%) | 8457 (28.1%)  | 1728 (43.7%) |
| No                                    | 23848 (70.1%) | 5761 (61.2%) | 8837 (67.0%)  | 9250 (80.9%) | 21618 (71.9%) | 2230 (56.3%) |
| Central nervous system radiation dose |               |              |               |              |               |              |

|                                                       |               |              |               |               |               |              |
|-------------------------------------------------------|---------------|--------------|---------------|---------------|---------------|--------------|
| None                                                  | 23848 (70.1%) | 5761 (61.2%) | 8837 (67.0%)  | 9250 (80.9%)  | 21618 (71.9%) | 2230 (56.3%) |
| ≥1-<20Gy                                              | 3158 (9.3%)   | 570 (6.1%)   | 1864 (14.1%)  | 724 (6.3%)    | 2857 (9.5%)   | 302 (7.6%)   |
| ≥20-<30Gy                                             | 2654 (7.8%)   | 1823 (19.4%) | 680 (5.2%)    | 151 (1.3%)    | 2276 (7.6%)   | 379 (9.6%)   |
| ≥30-<40Gy                                             | 347 (1.0%)    | 144 (1.5%)   | 136 (1.0%)    | 67 (0.6%)     | 256 (0.9%)    | 91 (2.3%)    |
| ≥40-<50Gy                                             | 726 (2.1%)    | 345 (3.7%)   | 298 (2.3%)    | 84 (0.7%)     | 484 (1.6%)    | 243 (6.1%)   |
| ≥50Gy                                                 | 3300 (9.7%)   | 772 (8.2%)   | 1367 (10.4%)  | 1161 (10.2%)  | 2585 (8.6%)   | 715 (18.1%)  |
| Craniospinal radiation                                |               |              |               |               |               |              |
| Yes                                                   | 2464 (7.3%)   | 789 (8.4%)   | 928 (7.0%)    | 747 (6.5%)    | 1902 (6.3%)   | 562 (14.2%)  |
| No                                                    | 31569 (92.8%) | 8627 (91.6%) | 12252 (93.0%) | 10689 (93.5%) | 28173 (93.7%) | 3396 (85.8%) |
| Craniospinal radiation dose                           |               |              |               |               |               |              |
| None                                                  | 31569 (92.8%) | 8627 (91.6%) | 12252 (93.0%) | 10689 (93.5%) | 28173 (93.7%) | 3396 (85.8%) |
| <30Gy                                                 | 1447 (4.3%)   | 581 (6.2%)   | 488 (3.7%)    | 378 (3.3%)    | 1106 (3.7%)   | 341 (8.6%)   |
| ≥30Gy                                                 | 1017 (3.0%)   | 208 (2.2%)   | 440 (3.3%)    | 369 (3.2%)    | 796 (2.6%)    | 221 (5.6%)   |
| Abdominal radiation                                   |               |              |               |               |               |              |
| Yes                                                   | 7912 (23.2%)  | 3081 (32.7%) | 2839 (21.5%)  | 1991 (17.4%)  | 6466 (21.5%)  | 1446 (36.5%) |
| No                                                    | 26121 (76.8%) | 6335 (67.3%) | 10342 (78.5%) | 9445 (82.6%)  | 23609 (78.5%) | 2513 (63.5%) |
| Abdominal radiation dose                              |               |              |               |               |               |              |
| None                                                  | 26121 (76.8%) | 6335 (67.3%) | 10342 (78.5%) | 9445 (82.6%)  | 23609 (78.5%) | 2513 (63.5%) |
| ≥1-<20Gy                                              | 2440 (7.2%)   | 499 (5.3%)   | 959 (7.3%)    | 983 (8.6%)    | 2126 (7.1%)   | 314 (7.9%)   |
| ≥20-<30Gy                                             | 2097 (6.2%)   | 863 (9.2%)   | 786 (6.0%)    | 447 (3.9%)    | 1814 (6.0%)   | 283 (7.2%)   |
| ≥30Gy                                                 | 3375 (9.9%)   | 1719 (18.3%) | 1094 (8.3%)   | 562 (4.9%)    | 2526 (8.4%)   | 849 (21.5%)  |
| Pelvic radiation                                      |               |              |               |               |               |              |
| Yes                                                   | 6427 (18.9%)  | 2465 (26.2%) | 2341 (17.8%)  | 1621 (14.2%)  | 5131 (17.1%)  | 1297 (32.8%) |
| No                                                    | 27606 (81.1%) | 6951 (73.8%) | 10840 (82.2%) | 9815 (85.8%)  | 24944 (82.9%) | 2662 (67.3%) |
| Anthracycline ( mg/m <sup>2</sup> )                   |               |              |               |               |               |              |
| None                                                  | 18590 (54.6%) | 6856 (72.8%) | 6895 (52.3%)  | 4840 (42.3%)  | 16252 (54.0%) | 2338 (59.1%) |
| 0-<150                                                | 4202 (12.3%)  | 353 (3.7%)   | 1427 (10.8%)  | 2422 (21.2%)  | 3903 (13.0%)  | 299 (7.6%)   |
| ≥150-<300                                             | 5647 (16.6%)  | 764 (8.1%)   | 2198 (16.7%)  | 2685 (23.5%)  | 5109 (17.0%)  | 538 (13.6%)  |
| ≥300-<450                                             | 4198 (12.3%)  | 897 (9.5%)   | 2047 (15.5%)  | 1254 (11.0%)  | 3723 (12.4%)  | 475 (12.0%)  |
| ≥450-<600                                             | 1192 (3.5%)   | 475 (5.0%)   | 516 (3.9%)    | 200 (1.7%)    | 927 (3.1%)    | 264 (6.7%)   |
| ≥600                                                  | 205 (0.6%)    | 71 (0.8%)    | 98 (0.7%)     | 35 (0.3%)     | 161 (0.5%)    | 44 (1.1%)    |
| Cyclophosphamide Equivalent Dose (mg/m <sup>2</sup> ) |               |              |               |               |               |              |
| None                                                  | 16283 (47.8%) | 5332 (56.6%) | 5961 (45.2%)  | 4991 (43.6%)  | 14552 (48.4%) | 1731 (43.7%) |
| 0 - <4,000                                            | 4323 (12.7%)  | 665 (7.1%)   | 1973 (15.0%)  | 1684 (14.7%)  | 3880 (12.9%)  | 443 (11.2%)  |
| ≥4000-<8000                                           | 4502 (13.2%)  | 822 (8.7%)   | 1789 (13.6%)  | 1891 (16.5%)  | 4097 (13.6%)  | 405 (10.2%)  |
| ≥8000-<12,000                                         | 3527 (10.4%)  | 827 (8.8%)   | 1514 (11.5%)  | 1186 (10.4%)  | 3129 (10.4%)  | 398 (10.1%)  |
| ≥12,000-<16,000                                       | 2190 (6.4%)   | 668 (7.1%)   | 980 (7.4%)    | 542 (4.7%)    | 1810 (6.0%)   | 380 (9.6%)   |
| ≥16,000-<20,000                                       | 1267 (3.7%)   | 435 (4.6%)   | 499 (3.8%)    | 333 (2.9%)    | 1043 (3.5%)   | 223 (5.6%)   |
| ≥20,000                                               | 1941 (5.7%)   | 666 (7.1%)   | 466 (3.5%)    | 808 (7.1%)    | 1563 (5.2%)   | 378 (9.6%)   |
| Epipodophyllotoxin ( mg/m <sup>2</sup> )              |               |              |               |               |               |              |
| Yes                                                   | 5712 (16.8%)  | 206 (2.2%)   | 1798 (13.6%)  | 3708 (32.4%)  | 5048 (16.8%)  | 664 (16.8%)  |
| No                                                    | 28321 (83.2%) | 9210 (97.8%) | 11383 (86.4%) | 7728 (67.6%)  | 25026 (83.2%) | 3295 (83.2%) |
| Bleomycin                                             |               |              |               |               |               |              |
| Yes                                                   | 2358 (6.9%)   | 271 (2.9%)   | 1153 (8.7%)   | 935 (8.2%)    | 2059 (6.8%)   | 299 (7.6%)   |
| No                                                    | 31675 (93.1%) | 9145 (97.1%) | 12028 (91.3%) | 10501 (91.8%) | 28015 (93.2%) | 3659 (92.4%) |
| Platinum                                              |               |              |               |               |               |              |
| Yes                                                   | 3757 (11.0%)  | 116 (1.2%)   | 1345 (10.2%)  | 2296 (20.1%)  | 3205 (10.7%)  | 552 (13.9%)  |
| No                                                    | 30277 (89.0%) | 9301 (98.8%) | 11836 (89.8%) | 9140 (79.9%)  | 26870 (89.3%) | 3407 (86.1%) |
| Methotrexate IV (mg/m <sup>2</sup> )                  |               |              |               |               |               |              |
| None                                                  | 26963 (79.2%) | 8052 (85.5%) | 10187 (77.3%) | 8724 (76.3%)  | 23744 (78.9%) | 3219 (81.3%) |
| >0-<5000                                              | 3753 (11.0%)  | 923 (9.8%)   | 1661 (12.6%)  | 1169 (10.2%)  | 3322 (11.0%)  | 430 (10.9%)  |
| ≥5000                                                 | 3318 (9.7%)   | 442 (4.7%)   | 1332 (10.1%)  | 1544 (13.5%)  | 3008 (10.0%)  | 309 (7.8%)   |
| Methotrexate IT                                       |               |              |               |               |               |              |
| Yes                                                   | 11036 (32.4%) | 3090 (32.8%) | 4993 (37.9%)  | 2954 (25.8%)  | 9834 (32.7%)  | 1203 (30.4%) |
| No                                                    | 22997 (67.6%) | 6326 (67.2%) | 8189 (62.1%)  | 8482 (74.2%)  | 20241 (67.3%) | 2756 (69.6%) |

Table S2. Distribution of treatment exposure for acute lymphoblastic leukemia, Hodgkin lymphoma, Wilms tumor and astrocytoma across three decades

|                                                       |               | 1970-1979 |      | 1980-1989 |      | 1990-1999 |      |
|-------------------------------------------------------|---------------|-----------|------|-----------|------|-----------|------|
|                                                       |               | N         | %    | N         | %    | N         | %    |
| Acute lymphoblastic leukemia                          |               | 2652      |      | 4922      |      | 5472      |      |
| Anthracycline (mg/m <sup>2</sup> )                    | None          | 1870      | 70.5 | 2042      | 41.5 | 856       | 15.6 |
|                                                       | 1-<150        | 211       | 7.9  | 1265      | 25.7 | 2758      | 50.4 |
|                                                       | ≥150-<300     | 227       | 8.6  | 810       | 16.4 | 1477      | 27.0 |
|                                                       | ≥300-<450     | 215       | 8.1  | 563       | 11.4 | 332       | 6.1  |
|                                                       | ≥450-<600     | 108       | 4.1  | 191       | 3.9  | 32        | 0.6  |
|                                                       | ≥600          | 21        | 0.8  | 51        | 1.0  | 17        | 0.3  |
| Steroid                                               | Prednisone    | 1659      | 62.6 | 3470      | 70.5 | 2164      | 39.5 |
|                                                       | Dexamethasone | 33        | 1.2  | 39        | 0.8  | 384       | 7.0  |
|                                                       | Both          | 56        | 2.1  | 789       | 16.0 | 2461      | 45.0 |
|                                                       |               | 904       | 34.1 | 624       | 12.7 | 463       | 8.5  |
| Epipodophyllotoxin                                    | Yes           | 96        | 3.6  | 1134      | 23.0 | 1971      | 36.0 |
|                                                       | No            | 2556      | 96.4 | 3787      | 77.0 | 3501      | 64.0 |
| Cranial RT                                            | None          | 384       | 14.5 | 2409      | 49.0 | 4409      | 80.6 |
|                                                       | 1-19.9 Gy     | 480       | 18.1 | 1813      | 36.8 | 820       | 15.0 |
|                                                       | ≥ 20 Gy       | 1788      | 67.4 | 699       | 14.2 | 243       | 4.4  |
|                                                       |               |           |      |           |      |           |      |
| Hodgkin Lymphoma                                      |               | 1597      |      | 1465      |      | 1270      |      |
| Chest RT dose                                         | None          | 209       | 13.1 | 309       | 21.1 | 500       | 39.3 |
|                                                       | ≥1-<20Gy      | 23        | 1.5  | 48        | 3.2  | 36        | 2.9  |
|                                                       | ≥20-<30Gy     | 136       | 8.5  | 332       | 22.6 | 518       | 40.8 |
|                                                       | ≥30Gy         | 1228      | 76.9 | 777       | 53.1 | 216       | 17.0 |
| Splenectomy                                           | Yes           | 1186      | 74.3 | 819       | 55.9 | 103       | 8.1  |
|                                                       | No            | 411       | 25.7 | 647       | 44.1 | 1167      | 91.9 |
| Cyclophosphamide Equivalent Dose (mg/m <sup>2</sup> ) | None          | 308       | 45.2 | 443       | 47.6 | 414       | 40.5 |
|                                                       | 0-<4000       | 45        | 6.7  | 76        | 8.2  | 144       | 14.1 |
|                                                       | ≥4000-<8000   | 63        | 9.3  | 180       | 19.4 | 225       | 22.0 |
|                                                       | ≥8000-<12000  | 62        | 9.1  | 107       | 11.5 | 55        | 5.4  |
|                                                       | ≥12000-<16000 | 54        | 8.0  | 51        | 5.5  | 62        | 6.0  |
|                                                       | ≥16000-<20000 | 55        | 8.1  | 31        | 3.4  | 55        | 5.4  |
|                                                       | ≥20000        | 93        | 13.7 | 42        | 4.5  | 67        | 6.6  |
| Anthracycline (mg/m <sup>2</sup> )                    | None          | 581       | 85.4 | 595       | 63.9 | 472       | 46.2 |
|                                                       | 1-<150        | 13        | 1.9  | 112       | 12.1 | 296       | 29.0 |
|                                                       | ≥150-<300     | 24        | 3.6  | 166       | 17.9 | 219       | 21.5 |
|                                                       | ≥300-<450     | 41        | 6.0  | 46        | 5.0  | 25        | 2.4  |
|                                                       | ≥450-<600     | 20        | 2.9  | 10        | 1.1  | 3         | 0.3  |
|                                                       | ≥600          | 1         | 0.2  | 1         | 0.1  | 6         | 0.6  |
|                                                       |               |           |      |           |      |           |      |
| Wilms tumor                                           |               | 814       |      | 1173      |      | 1068      |      |
| Anthracycline (mg/m <sup>2</sup> )                    | None          | 611       | 75.0 | 566       | 48.3 | 493       | 46.2 |
|                                                       | 1-<150        | 16        | 2.0  | 68        | 5.8  | 309       | 28.9 |
|                                                       | ≥150-<300     | 118       | 14.5 | 358       | 30.6 | 207       | 19.3 |
|                                                       | ≥300-<450     | 62        | 7.6  | 167       | 14.3 | 56        | 5.2  |
|                                                       | ≥450-<600     | 5         | 0.6  | 6         | 0.5  | 2         | 0.2  |
|                                                       | ≥600          | 3         | 0.3  | 7         | 0.6  | 2         | 0.2  |
| Abdomen RT dose                                       | None          | 180       | 22.1 | 552       | 47.1 | 604       | 56.5 |
|                                                       | ≥1-<20Gy      | 80        | 9.9  | 264       | 22.5 | 411       | 38.5 |

|                  |                       |     |      |      |      |      |      |
|------------------|-----------------------|-----|------|------|------|------|------|
|                  | $\geq 20$ - $< 30$ Gy | 256 | 31.5 | 309  | 26.3 | 35   | 3.2  |
|                  | $\geq 30$ Gy          | 297 | 36.5 | 48   | 4.1  | 19   | 1.8  |
|                  |                       |     |      |      |      |      |      |
| Astrocytoma      |                       | 824 |      | 1410 |      | 1670 |      |
| Cranial RT       | Yes                   | 454 | 55.0 | 704  | 49.9 | 407  | 24.4 |
|                  | No                    | 371 | 45.0 | 706  | 50.1 | 1263 | 75.6 |
| Any Chemotherapy | Yes                   | 136 | 16.5 | 329  | 23.3 | 540  | 32.4 |
|                  | No                    | 688 | 83.5 | 1081 | 76.7 | 1130 | 67.6 |

Table S3. Cumulative incidence of all-cause, recurrence/progression, and health-related cause late mortality at 15 years from primary cancer diagnosis

|                               | 1970-1979 |                          |             | 1980-1989 |                          |             | 1990-1999 |                          |             | P value |
|-------------------------------|-----------|--------------------------|-------------|-----------|--------------------------|-------------|-----------|--------------------------|-------------|---------|
|                               | At risk   | Cumulative incidence (%) | 95% CI      | At risk   | Cumulative incidence (%) | 95% CI      | At risk   | Cumulative incidence (%) | 95% CI      |         |
| <b>All cause</b>              |           |                          |             |           |                          |             |           |                          |             |         |
| All diagnoses                 | 8406      | 10.74                    | 10.1 - 11.4 | 13105     | 7.86                     | 7.4 - 8.3   | 3924      | 5.80                     | 5.4 - 6.3   | <.001   |
| All Leukemias                 | 2559      | 14.22                    | 13.0 - 15.5 | 5064      | 8.37                     | 7.6 - 9.1   | 1657      | 4.74                     | 4.1 - 5.4   | <.001   |
| Acute lymphoblastic leukemia  | 2300      | 13.31                    | 12.0 - 14.6 | 4533      | 7.92                     | 7.2 - 8.7   | 1448      | 4.67                     | 4.0 - 5.3   | <.001   |
| Acute myeloid leukemia        | 169       | 14.29                    | 9.4 - 19.2  | 404       | 7.99                     | 5.5 - 10.5  | 161       | 3.55                     | 1.9 - 5.2   | <.001   |
| Other leukemia                | 92        | 32.09                    | 24.2 - 40.0 | 129       | 22.89                    | 16.5 - 29.3 | 50        | 10.66                    | 5.1 - 16.2  | <.001   |
| All CNS tumors                | 1051      | 14.36                    | 12.4 - 16.3 | 2037      | 11.26                    | 10.0 - 12.6 | 746       | 8.97                     | 7.7 - 10.2  | <.001   |
| Astrocytoma                   | 720       | 12.74                    | 10.5 - 15.0 | 1283      | 9.06                     | 7.6 - 10.6  | 475       | 6.82                     | 5.4 - 8.3   | <.001   |
| Medulloblastoma               | 179       | 21.93                    | 16.6 - 27.3 | 420       | 15.09                    | 11.9 - 18.3 | 153       | 14.06                    | 10.8 - 17.4 | 0.006   |
| Other CNS tumors              | 154       | 12.07                    | 7.2 - 16.9  | 336       | 14.32                    | 10.9 - 17.8 | 121       | 9.70                     | 6.4 - 13.0  | 0.03    |
| Hodgkin lymphoma              | 1428      | 10.64                    | 9.1 - 12.2  | 1359      | 7.30                     | 6.0 - 8.6   | 317       | 4.89                     | 3.4 - 6.4   | <.001   |
| Non-Hodgkin lymphoma          | 659       | 6.67                     | 4.8 - 8.5   | 1052      | 4.45                     | 3.2 - 5.7   | 263       | 3.78                     | 2.3 - 5.3   | 0.01    |
| Wilms tumor                   | 785       | 3.69                     | 2.4 - 5.0   | 1146      | 2.39                     | 1.5 - 3.3   | 310       | 2.17                     | 1.1 - 3.2   | 0.12    |
| Neuroblastoma                 | 653       | 4.12                     | 2.6 - 5.6   | 887       | 4.82                     | 3.4 - 6.2   | 257       | 6.52                     | 4.8 - 8.2   | 0.04    |
| Rhabdomyosarcoma              | 525       | 4.55                     | 2.8 - 6.3   | 577       | 6.19                     | 4.3 - 8.1   | 152       | 5.31                     | 3.1 - 7.6   | 0.47    |
| All Bone tumors               | 753       | 12.86                    | 10.6 - 15.1 | 990       | 11.58                    | 9.7 - 13.5  | 227       | 10.50                    | 8.3 - 12.7  | 0.46    |
| Ewing sarcoma                 | 224       | 19.78                    | 15.1 - 24.5 | 326       | 14.70                    | 11.1 - 18.3 | 72        | 9.48                     | 6.1 - 12.9  | 0.004   |
| Osteosarcoma                  | 487       | 9.83                     | 7.3 - 12.3  | 613       | 10.34                    | 8.0 - 12.6  | 141       | 11.94                    | 8.9 - 15.0  | 0.34    |
| Other bone tumors             | 44        | 6.52                     | 0.0 - 13.7  | 53        | 5.45                     | 0.0 - 11.5  | 16        | 2.86                     | 0.0 - 8.4   | 0.55    |
| <b>Recurrence/Progression</b> |           |                          |             |           |                          |             |           |                          |             |         |
| All diagnoses                 | 8406      | 7.12                     | 6.6 - 7.6   | 13105     | 4.89                     | 4.5 - 5.3   | 3924      | 3.42                     | 3.1 - 3.8   | <.001   |
| All Leukemias                 | 2559      | 10.98                    | 9.8 - 12.1  | 5064      | 5.49                     | 4.9 - 6.1   | 1657      | 2.31                     | 1.9 - 2.7   | <.001   |
| Acute lymphoblastic leukemia  | 2300      | 10.25                    | 9.1 - 11.4  | 4533      | 5.23                     | 4.6 - 5.9   | 1448      | 2.19                     | 1.8 - 2.6   | <.001   |
| Acute myeloid leukemia        | 169       | 11.22                    | 6.6 - 15.8  | 404       | 4.04                     | 2.1 - 5.9   | 161       | 2.07                     | 0.8 - 3.3   | <.001   |
| Other leukemia                | 92        | 25.00                    | 17.5 - 32.5 | 129       | 17.11                    | 11.2 - 23.0 | 50        | 6.83                     | 2.1 - 11.6  | <.001   |
| All CNS tumors                | 1051      | 8.98                     | 7.3 - 10.6  | 2037      | 7.49                     | 6.4 - 8.6   | 746       | 5.91                     | 4.9 - 6.9   | 0.003   |
| Astrocytoma                   | 720       | 7.72                     | 5.8 - 9.6   | 1283      | 6.13                     | 4.9 - 7.4   | 475       | 4.41                     | 3.2 - 5.6   | 0.02    |
| Medulloblastoma, PNET         | 179       | 16.14                    | 11.3 - 21.0 | 420       | 11.08                    | 8.2 - 13.9  | 153       | 10.11                    | 7.5 - 12.7  | 0.05    |
| Other CNS tumors              | 154       | 5.57                     | 2.1 - 9.0   | 336       | 7.90                     | 5.1 - 10.7  | 121       | 5.37                     | 2.9 - 7.8   | 0.23    |
| Hodgkin lymphoma              | 1428      | 5.74                     | 4.6 - 6.9   | 1359      | 3.11                     | 2.2 - 4.0   | 317       | 2.45                     | 1.4 - 3.5   | <.001   |
| Non-Hodgkin lymphoma          | 659       | 2.75                     | 1.5 - 4.0   | 1052      | 1.34                     | 0.6 - 2.0   | 263       | 0.76                     | 0.1 - 1.4   | 0.003   |
| Wilms tumor                   | 785       | 1.27                     | 0.5 - 2.0   | 1146      | 1.59                     | 0.9 - 2.3   | 310       | 1.34                     | 0.6 - 2.1   | 0.81    |
| Neuroblastoma                 | 653       | 2.93                     | 1.7 - 4.2   | 887       | 3.33                     | 2.2 - 4.5   | 257       | 5.22                     | 3.7 - 6.8   | 0.04    |
| Rhabdomyosarcoma              | 525       | 2.22                     | 1.0 - 3.5   | 577       | 3.62                     | 2.1 - 5.2   | 152       | 3.83                     | 1.8 - 5.8   | 0.29    |
| All Bone tumors               | 753       | 9.15                     | 7.2 - 11.1  | 990       | 7.91                     | 6.3 - 9.5   | 227       | 7.80                     | 6.0 - 9.6   | 0.59    |
| Ewing sarcoma                 | 224       | 14.53                    | 10.3 - 18.7 | 326       | 10.89                    | 7.7 - 14.0  | 72        | 6.98                     | 4.1 - 9.9   | 0.02    |
| Osteosarcoma                  | 487       | 6.66                     | 4.5 - 8.8   | 613       | 6.73                     | 4.8 - 8.6   | 141       | 9.16                     | 6.6 - 11.8  | 0.14    |
| Other bone tumors             | 44        | 5.87                     | 0.0 - 13.0  | 53        | 1.82                     | 0.0 - 5.3   | 16        | 0.00                     | 0.0 - 0.0   | 0.19    |
| <b>Health-related Cause</b>   |           |                          |             |           |                          |             |           |                          |             |         |
| All diagnoses                 | 8406      | 3.11                     | 2.7 - 3.5   | 13105     | 2.43                     | 2.2 - 2.7   | 3924      | 1.90                     | 1.6 - 2.2   | <.001   |
| All Leukemias                 | 2559      | 2.92                     | 2.3 - 3.6   | 5064      | 2.44                     | 2.0 - 2.9   | 1657      | 1.88                     | 1.4 - 2.3   | <.001   |
| Acute lymphoblastic leukemia  | 2300      | 2.76                     | 2.1 - 3.4   | 4533      | 2.28                     | 1.8 - 2.7   | 1448      | 1.87                     | 1.4 - 2.3   | <.001   |
| Acute myeloid leukemia        | 169       | 2.35                     | 0.0 - 4.9   | 404       | 3.17                     | 1.5 - 4.9   | 161       | 1.31                     | 0.3 - 2.3   | 0.21    |
| Other leukemia                | 92        | 7.01                     | 2.4 - 11.6  | 129       | 5.18                     | 1.6 - 8.8   | 50        | 3.83                     | 0.8 - 6.9   | 0.56    |
| All CNS tumors                | 1051      | 4.80                     | 3.5 - 6.1   | 2037      | 3.10                     | 2.4 - 3.8   | 746       | 2.69                     | 1.9 - 3.5   | 0.002   |
| Astrocytoma                   | 720       | 4.41                     | 2.9 - 5.9   | 1283      | 2.44                     | 1.6 - 3.3   | 475       | 1.91                     | 1.1 - 2.7   | 0.01    |
| Medulloblastoma, PNET         | 179       | 5.35                     | 2.4 - 8.3   | 420       | 3.61                     | 1.9 - 5.3   | 153       | 3.77                     | 1.7 - 5.9   | 0.25    |
| Other CNS tumors              | 154       | 5.92                     | 2.4 - 9.5   | 336       | 4.86                     | 2.6 - 7.1   | 121       | 4.11                     | 1.6 - 6.6   | 0.34    |
| Hodgkin lymphoma              | 1428      | 4.22                     | 3.2 - 5.2   | 1359      | 3.43                     | 2.5 - 4.4   | 317       | 2.01                     | 0.9 - 3.1   | 0.02    |
| Non-Hodgkin lymphoma          | 659       | 3.38                     | 2.0 - 4.7   | 1052      | 2.44                     | 1.5 - 3.4   | 263       | 2.24                     | 1.1 - 3.4   | 0.34    |
| Wilms tumor                   | 785       | 2.17                     | 1.2 - 3.2   | 1146      | 0.62                     | 0.2 - 1.1   | 310       | 0.41                     | 0.0 - 0.9   | <.001   |
| Neuroblastoma                 | 653       | 0.87                     | 0.1 - 1.6   | 887       | 1.10                     | 0.4 - 1.8   | 257       | 1.14                     | 0.4 - 1.9   | 0.75    |



|                   |     |      |           |     |      |           |     |      |           |      |
|-------------------|-----|------|-----------|-----|------|-----------|-----|------|-----------|------|
| Rhabdomyosarcoma  | 525 | 1.91 | 0.7 - 3.1 | 577 | 1.99 | 0.8 - 3.2 | 152 | 0.81 | 0.0 - 1.7 | 0.35 |
| All Bone tumors   | 753 | 2.51 | 1.4 - 3.6 | 990 | 2.97 | 2.0 - 4.0 | 227 | 2.35 | 1.1 - 3.6 | 0.61 |
| Ewing sarcoma     | 224 | 4.42 | 1.9 - 6.9 | 326 | 3.41 | 1.6 - 5.3 | 72  | 1.89 | 0.2 - 3.6 | 0.28 |
| Osteosarcoma      | 487 | 1.74 | 0.5 - 3.0 | 613 | 2.66 | 1.4 - 3.9 | 141 | 2.53 | 0.8 - 4.2 | 0.63 |
| Other bone tumors | 44  | 0.00 | 0.0 - 0.0 | 53  | 3.64 | 0.0 - 8.6 | 16  | 2.86 | 0.0 - 8.4 | 0.43 |

| Table S4. Frequencies of underlying cause of death in five-year survivors of childhood cancer |                                                                         |                   |                  |
|-----------------------------------------------------------------------------------------------|-------------------------------------------------------------------------|-------------------|------------------|
| Category of Death                                                                             | Underlying Cause of Death                                               | ICD-9/ICD-10 Code | Number of Deaths |
| Recurrence                                                                                    | Acute Leukemia                                                          | 2040              | 392              |
|                                                                                               | Brain, unspecified- Malignant neoplasms                                 | 1919              | 162              |
|                                                                                               | Hodgkin's disease, unspecified- Malignant neoplasms                     | 2019              | 154              |
|                                                                                               | Bone and articular cartilage, site unspecified- Malignant neoplasms     | 1709              | 142              |
|                                                                                               | Brain, unspecified - Malignant neoplasms                                | C719              | 80               |
|                                                                                               | Cerebellum NOS- Malignant neoplasms                                     | 1916              | 79               |
|                                                                                               | Bone and articular cartilage, unspecified – Malignant neoplasms         | C419              | 60               |
|                                                                                               | Unspecified leukemia- Malignant neoplasms                               | 2089              | 58               |
|                                                                                               | Acute leukemia, unspecified- Malignant neoplasms                        | 2080              | 46               |
|                                                                                               | Adrenal gland- Malignant neoplasms                                      | 1940              | 45               |
|                                                                                               | Connective and other soft tissue, site unspecified- Malignant neoplasms | 1719              | 41               |
|                                                                                               | Acute lymphoblastic leukemia - Malignant neoplasms                      | C910              | 36               |
|                                                                                               | Kidney, except pelvis- Malignant neoplasms                              | 1890              | 36               |
|                                                                                               | Other lymphomas- Malignant neoplasms                                    | 2028              | 36               |
|                                                                                               | Adrenal gland, unspecified - Malignant neoplasms                        | C749              | 32               |
|                                                                                               | Chronic leukemia- Malignant neoplasms                                   | 2051              | 30               |
|                                                                                               | Cerebellum - Malignant neoplasms                                        | C716              | 27               |
|                                                                                               | Hodgkin's disease, unspecified - Malignant neoplasms                    | C819              | 27               |
|                                                                                               | Acute Myeloid leukemia- Malignant neoplasms                             | 2050              | 24               |
|                                                                                               | Brain stem- Malignant neoplasms                                         | 1917              | 19               |
|                                                                                               | Cerebrum, except lobes and ventricles                                   | 1910              | 19               |
|                                                                                               | Malignant neoplasm without specification of site                        | 1991              | 19               |
|                                                                                               | Bronchus and lung, unspecified- Malignant neoplasms                     | 1629              | 12               |
|                                                                                               | Unspecified lymphoid leukemia- Malignant neoplasms                      | 2049              | 12               |
|                                                                                               | Leukemia, unspecified - Malignant neoplasms                             | C959              | 11               |
|                                                                                               | Brain stem - Malignant neoplasms                                        | C717              | 10               |
|                                                                                               | Cranial nerves- Malignant neoplasms                                     | 1920              | 10               |
|                                                                                               | Malignant neoplasm of kidney, except renal pelvis                       | C64               | 9                |
|                                                                                               | Connective and soft tissue, unspecified – Malignant neoplasms           | C499              | 8                |
|                                                                                               | Long bones of lower limb- Malignant neoplasms                           | 1707              | 8                |
|                                                                                               | Chronic myeloid leukemia - Malignant neoplasms                          | C921              | 7                |
|                                                                                               | Malignant neoplasm without specification of site                        | C80               | 7                |
|                                                                                               | Acute myeloid leukemia - Malignant neoplasms                            | C920              | 6                |
|                                                                                               | Malignant neoplasm of lymphatic and hematopoietic tissue                | 208               | 6                |
|                                                                                               | Non-Hodgkin's lymphoma, unspecified type – Malignant neoplasms          | C859              | 6                |
|                                                                                               | Malignant neoplasms of independent (primary) multiple sites             | C97               | 5                |

|                                                                                 |      |   |
|---------------------------------------------------------------------------------|------|---|
| Nodular sclerosis- Malignant neoplasms                                          | 2015 | 5 |
| Pelvis- Malignant neoplasms                                                     | 1716 | 5 |
| Pineal gland- Malignant neoplasms                                               | 1944 | 5 |
| Cerebral meninges- Malignant neoplasms                                          | 1921 | 4 |
| Cerebrum, except lobes and ventricles – Malignant neoplasms                     | C710 | 4 |
| Nasopharynx, unspecified- Malignant neoplasms                                   | 1479 | 4 |
| Peripheral nerves and autonomic nervous system, unspecified-Malignant neoplasms | C479 | 4 |
| Vertebral column, excluding sacrum and coccyx- Malignant neoplasms              | 1702 | 4 |
| Acute leukemia of unspecified cell type – Malignant neoplasms                   | C950 | 3 |
| Frontal lobe- Malignant neoplasms                                               | 1911 | 3 |
| Long bones of lower limb - Malignant neoplasms                                  | C402 | 3 |
| Malignant neoplasm of other and unspecified sites                               | 199  | 3 |
| Spinal cord- Malignant neoplasms                                                | 1922 | 3 |
| Testis, unspecified - Malignant neoplasms                                       | C629 | 3 |
| Bladder, part unspecified- Malignant neoplasms                                  | 1889 | 2 |
| Bones of skull and face, except mandible- Malignant neoplasms                   | 1700 | 2 |
| Malignant neoplasm of uterus, part unspecified                                  | 179  | 2 |
| Mediastinum, part unspecified- Malignant neoplasms                              | 1649 | 2 |
| Nervous system, part unspecified- Malignant neoplasms                           | 1929 | 2 |
| Orbit- Malignant neoplasms                                                      | 1901 | 2 |
| Parietal lobe- Malignant neoplasms                                              | 1913 | 2 |
| Pelvic bones, sacrum and coccyx - Malignant neoplasms                           | C414 | 2 |
| Pelvic bones, sacrum, and coccyx- Malignant neoplasms                           | 1706 | 2 |
| Pituitary gland and craniopharyngeal duct- Malignant neoplasms                  | 1943 | 2 |
| Spinal cord - Malignant neoplasms                                               | C720 | 2 |
| Temporal lobe- Malignant neoplasms                                              | 1912 | 2 |
| Ventricles- Malignant neoplasms                                                 | 1915 | 2 |
| Bladder, unspecified - Malignant neoplasms                                      | C679 | 1 |
| Brain, unspecified - Uncertain neoplasms                                        | D432 | 1 |
| Breast (female), unspecified                                                    | 1749 | 1 |
| Bronchus or lung, unspecified - Malignant neoplasms                             | C349 | 1 |
| Cardia- Malignant neoplasms                                                     | 1510 | 1 |
| Central nervous system, unspecified - Malignant neoplasms                       | C729 | 1 |
| Cerebral meninges - Malignant neoplasms                                         | C700 | 1 |
| Cervix uteri, unspecified- Malignant neoplasms                                  | 1809 | 1 |
| Chronic Lymphoid leukemia - Malignant neoplasms                                 | 2041 | 1 |
| Chronic Leukemia of unspecified cell type - Malignant neoplasms                 | 2081 | 1 |
| Chronic leukemia of unspecified cell type - Malignant                           | C951 | 1 |

|                     |                                                                         |         |     |
|---------------------|-------------------------------------------------------------------------|---------|-----|
|                     | Colon, unspecified- Malignant neoplasms                                 | 1539    | 1   |
|                     | Connective and soft tissue of lower limb,                               | C492    | 1   |
|                     | Connective and soft tissue of thorax - Malignant                        | C493    | 1   |
|                     | Frontal lobe - Malignant neoplasms                                      | C711    | 1   |
|                     | Head, face, and neck- Malignant neoplasms                               | 1710    | 1   |
|                     | Lymphocytic predominance - Malignant neoplasms                          | C810    | 1   |
|                     | Megakaryocytic leukemia- Malignant neoplasms                            | 2072    | 1   |
|                     | Mixed cellularity- Malignant neoplasms                                  | 2016    | 1   |
|                     | Mouth, unspecified- Malignant neoplasm                                  | 1459    | 1   |
|                     | Nodular lymphoma- Malignant neoplasm                                    | 2020    | 1   |
|                     | Other and unspecified T-cell lymphomas – Malignant neoplasm             | C845    | 1   |
|                     | Other and unspecified malignant neoplasm                                | 2029    | 1   |
|                     | Overlapping lesion of brain - Malignant neoplasms                       | C718    | 1   |
|                     | Pharynx, unspecified- Malignant neoplasms                               | 1490    | 1   |
|                     | Rectum- Malignant neoplasms                                             | 1541    | 1   |
|                     | Retina- Malignant neoplasms                                             | 1905    | 1   |
|                     | Retroperitoneum- Malignant neoplasms                                    | 1580    | 1   |
|                     | Retroperitoneum - Malignant neoplasms                                   | C480    | 1   |
|                     | Short bones of lower limb - Malignant neoplasms                         | C403    | 1   |
|                     | Stomach, unspecified- Malignant neoplasms                               | 1519    | 1   |
|                     | Thorax- Malignant neoplasms                                             | 1951    | 1   |
|                     | Unknown                                                                 | Unknown | 210 |
| Subsequent neoplasm | Brain-Neoplasms of unspecified nature                                   | 2396    | 62  |
|                     | Brain, unspecified- Malignant neoplasms                                 | 1919    | 49  |
|                     | Acute Myeloid leukemia                                                  | 2050    | 35  |
|                     | Brain, unspecified - Malignant neoplasms                                | C719    | 35  |
|                     | Breast (female), unspecified- Malignant neoplasms                       | 1749    | 35  |
|                     | Connective and other soft tissue, site unspecified- Malignant neoplasms | 1719    | 33  |
|                     | Bone and articular cartilage, site unspecified- Malignant neoplasms     | 1709    | 26  |
|                     | Bronchus and lung, unspecified- Malignant neoplasms                     | 1629    | 19  |
|                     | Malignant neoplasms of independent (primary) multiple sites             | C97     | 15  |
|                     | Breast, unspecified - Malignant neoplasms                               | C509    | 13  |
|                     | Hodgkin's disease, unspecified- Malignant neoplasms                     | 2019    | 13  |
|                     | Bone and articular cartilage, unspecified – Malignant neoplasms         | C419    | 12  |
|                     | Bronchus or lung, unspecified - Malignant neoplasms                     | C349    | 12  |
|                     | Other lymphomas- Malignant neoplasms                                    | 2028    | 12  |
|                     | Acute myeloid leukemia - Malignant neoplasms                            | C920    | 10  |
|                     | Connective and soft tissue, unspecified – Malignant neoplasms           | C499    | 10  |
|                     | Malignant neoplasm without specification of site                        | 1991    | 10  |

|  |                                                                |      |    |
|--|----------------------------------------------------------------|------|----|
|  | Stomach, unspecified- Malignant neoplasms                      | 1519 | 10 |
|  | Colon, unspecified- Malignant neoplasms                        | 1539 | 9  |
|  | Malignant neoplasm without specification of site               | C80  | 9  |
|  | Acute Lymphoid leukemia - Malignant neoplasms                  | 2040 | 7  |
|  | Brain and spinal cord neoplasms of uncertain behavior          | 2375 | 7  |
|  | Unspecified leukemia- Malignant neoplasms                      | 2089 | 7  |
|  | Colon, unspecified - Malignant neoplasms                       | C189 | 6  |
|  | Lymphosarcoma- Malignant neoplasms                             | 2001 | 6  |
|  | Melanoma of skin, site unspecified- Malignant neoplasms        | 1729 | 6  |
|  | Neurofibromatosis                                              | 2377 | 5  |
|  | Acute Leukemia of unspecified cell type                        | 2080 | 4  |
|  | Cerebellum nos- Malignant neoplasms                            | 1916 | 4  |
|  | Cerebral meninges-benign neoplasm                              | 2252 | 4  |
|  | Hodgkin's disease, unspecified - Malignant neoplasm            | C819 | 4  |
|  | Kidney, except pelvis- Malignant neoplasms                     | 1890 | 4  |
|  | Liver, not specified as primary or secondary                   | 1552 | 4  |
|  | Malignant neoplasm of kidney, except renal pelvis              | C64  | 4  |
|  | Malignant neoplasm of other and unspecified sites              | 199  | 4  |
|  | Mesothelioma, unspecified - Malignant neoplasms                | C459 | 4  |
|  | Non-Hodgkin's lymphoma, unspecified type – Malignant neoplasms | C859 | 4  |
|  | Reticulosarcoma- Malignant neoplasms                           | 2000 | 4  |
|  | Acute lymphoblastic leukemia - Malignant neoplasm              | C910 | 3  |
|  | Adrenal gland, unspecified - Malignant neoplasms               | C749 | 3  |
|  | Bladder, part unspecified- Malignant neoplasms                 | 1889 | 3  |
|  | Cerebellum - Malignant neoplasms                               | C716 | 3  |
|  | Endocrine glands and other parts of nervous system             | 2397 | 3  |
|  | Leukemia, unspecified - Malignant neoplasms                    | C959 | 3  |
|  | Malignant melanoma of skin, unspecified - Malignant neoplasms  | C439 | 3  |
|  | Other and unspecified testis- Malignant neoplasms              | 1869 | 3  |
|  | Pancreas, part unspecified- Malignant neoplasms                | 1579 | 3  |
|  |                                                                |      |    |
|  | Adrenal gland- Malignant neoplasms                             | 1940 | 2  |
|  | Bones of skull and face, except mandible- Malignant neoplasms  | 1700 | 2  |
|  | Brain stem - Malignant neoplasms                               | C717 | 2  |
|  | Cerebral meninges - Benign neoplasms                           | D320 | 2  |
|  | Cerebrum, except lobes and ventricles- Malignant neoplasms     | 1910 | 2  |
|  | Esophagus, unspecified- Malignant neoplasms                    | 1509 | 2  |
|  | Head, face and neck - Malignant neoplasms                      | C760 | 2  |
|  | Liver cell carcinoma - Malignant neoplasms                     | C220 | 2  |

|  |                                                                         |      |   |
|--|-------------------------------------------------------------------------|------|---|
|  | Malignant neoplasm of digestive organs and peritoneum                   | 155  | 2 |
|  | Malignant neoplasm of ovary                                             | C56  | 2 |
|  | Malignant neoplasm of thyroid gland                                     | C73  | 2 |
|  | Esophagus, unspecified - Malignant neoplasms                            | C159 | 2 |
|  | Ovary- Malignant neoplasms                                              | 1830 | 2 |
|  | Pancreas, unspecified - Malignant neoplasms                             | C259 | 2 |
|  | Pelvic bones, sacrum, and coccyx- Malignant neoplasms                   | 1706 | 2 |
|  | Site unspecified benign neoplasm                                        | 2299 | 2 |
|  | Spinal cord- Malignant neoplasms                                        | 1922 | 2 |
|  | Spinal cord - Malignant neoplasms                                       | C720 | 2 |
|  | Tongue, unspecified- Malignant neoplasms                                | 1419 | 2 |
|  | Unspecified myeloid leukemia- Malignant neoplasms                       | 2059 | 2 |
|  | Abdomen- Malignant neoplasms                                            | 1715 | 1 |
|  | Accessory sinus, unspecified- Malignant neoplasms                       | 1609 | 1 |
|  | Accessory sinus, unspecified - Malignant neoplasms                      | C319 | 1 |
|  | Acute Monocytic Leukemia- Malignant neoplasms                           | 2060 | 1 |
|  | Acute leukemia of unspecified cell type - Malignant neoplasms           | C950 | 1 |
|  | Acute promyelocytic leukemia - Malignant neoplasms                      | C924 | 1 |
|  | Auditory tube, middle ear, and mastoid air cells- Malignant neoplasms   | 1601 | 1 |
|  | Base of tongue- Malignant neoplasms                                     | 1410 | 1 |
|  | Biliary tract, part unspecified- Malignant neoplasms                    | 1569 | 1 |
|  | Bone, soft tissue, and skin-neoplasms of unspecified nature             | 2392 | 1 |
|  | Brain stem- Malignant neoplasms                                         | 1917 | 1 |
|  | Burkitt's tumor or lymphoma- Malignant neoplasms                        | 2002 | 1 |
|  | Central nervous system, unspecified - Malignant neoplasms               | C729 | 1 |
|  | Cerebral meninges- Malignant neoplasms                                  | 1921 | 1 |
|  | Cerebrum, except lobes and ventricles - Malignant neoplasms             | C710 | 1 |
|  | Chronic myeloid leukemia                                                | 2051 | 1 |
|  | Chronic myeloid leukaemia - Malignant neoplasms                         | C921 | 1 |
|  | Colon, unspecified - Benign neoplasms                                   | D126 | 1 |
|  | Connective and soft tissue of head, face and neck - Malignant neoplasms | C490 | 1 |
|  | Connective and soft tissue of pelvis - Malignant neoplasms              | C495 | 1 |
|  | Corpus uteri, except isthmus- Malignant neoplasms                       | 1820 | 1 |
|  | Cranial nerves benign neoplasms                                         | 2251 | 1 |
|  | Digestive system neoplasm of unspecified nature                         | 2390 | 1 |
|  | Duodenum - Malignant neoplasms                                          | C170 | 1 |
|  | Heart benign neoplasm                                                   | 2127 | 1 |
|  | Ill-defined sites within the digestive system - Malignant neoplasms     | C269 | 1 |
|  | Intrahepatic bile duct carcinoma - Malignant neoplasms                  | C221 | 1 |

|  |                                                                                   |      |   |
|--|-----------------------------------------------------------------------------------|------|---|
|  | Liver, primary- Malignant neoplasms                                               | 1550 | 1 |
|  | Lymphoblastic (diffuse) - Malignant neoplasms                                     | C835 | 1 |
|  | Malignant neoplasm of gallbladder                                                 | C23  | 1 |
|  | Malignant neoplasm of male breast                                                 | 175  | 1 |
|  | Malignant neoplasm of other and unspecified sites                                 | 191  | 1 |
|  | Malignant neoplasm of other and unspecified sites                                 | 195  | 1 |
|  | Malignant neoplasm of other and unspecified sites                                 | 1985 | 1 |
|  | Malignant neoplasm of rectosigmoid junction                                       | C19  | 1 |
|  | Malignant neoplasm of rectum                                                      | C20  | 1 |
|  | Malignant neoplasm of renal pelvis                                                | C65  | 1 |
|  | Malignant neoplasm of respiratory and intrathoracic organs                        | 164  | 1 |
|  | Malignant neoplasm of uterus, part unspecified                                    | C55  | 1 |
|  | Mediastinum benign neoplasm                                                       | 2125 | 1 |
|  | Megakaryocytic leukemia- Malignant neoplasms                                      | 2072 | 1 |
|  | Meninges, unspecified - Benign neoplasms                                          | D329 | 1 |
|  | Meninges, unspecified - Malignant neoplasms                                       | C709 | 1 |
|  | Mesothelioma of other sites - Malignant neoplasms                                 | C457 | 1 |
|  | Mesothelioma of pericardium - Malignant neoplasms                                 | C452 | 1 |
|  | Mouth, unspecified- Malignant neoplasms                                           | 1459 | 1 |
|  | Myeloid leukemia, unspecified - Malignant neoplasms                               | C929 | 1 |
|  | Nasopharynx, unspecified- Malignant neoplasms                                     | 1479 | 1 |
|  | Occipital lobe - Malignant neoplasms                                              | C714 | 1 |
|  | Oropharynx, unspecified - Malignant neoplasms                                     | C109 | 1 |
|  | Other and unspecified T-cell lymphomas - Malignant neoplasms                      | C845 | 1 |
|  | Other lymphatic and hematopoietic tissues                                         | 2387 | 1 |
|  | Other named variants- Malignant neoplasms                                         | 2008 | 1 |
|  | Other specified sites- Malignant neoplasms                                        | 1958 | 1 |
|  | Other specified sites neoplasms of unspecified nature                             | 2398 | 1 |
|  | Parotid gland- Malignant neoplasms                                                | 1420 | 1 |
|  | Pelvis- Malignant neoplasms                                                       | 1716 | 1 |
|  | Peripheral nerves and autonomic nervous system - Benign neoplasms                 | D361 | 1 |
|  | Peripheral nerves and autonomic nervous system, unspecified - Malignant neoplasms | C479 | 1 |
|  | Pineal gland neoplasms of uncertain behavior                                      | 2371 | 1 |
|  | Pleura, unspecified- Malignant neoplasms                                          | 1639 | 1 |
|  | Ribs, sternum, and clavicle- Malignant neoplasms                                  | 1703 | 1 |
|  | Secondary malignant neoplasm of bone and bone marrow - Malignant neoplasms        | C795 | 1 |
|  | Secondary malignant neoplasm of brain and cerebral meninges - Malignant neoplasms | C793 | 1 |
|  | Secondary malignant neoplasm of other specified sites - Malignant neoplasms       | C798 | 1 |

|                |                                                           |         |    |
|----------------|-----------------------------------------------------------|---------|----|
|                | Skin of lower limb, including hip- Malignant neoplasms    | 1737    | 1  |
|                | Skin of scalp and neck - Malignant neoplasms              | C444    | 1  |
|                | Small intestine, unspecified- Malignant neoplasms         | 1529    | 1  |
|                | Small intestine, unspecified - Malignant neoplasms        | C179    | 1  |
|                | Specified parts of peritoneum- Malignant neoplasms        | 1588    | 1  |
|                | Stomach, unspecified - Malignant neoplasms                | C169    | 1  |
|                | Temporal lobe- Malignant neoplasms                        | 1912    | 1  |
|                | Tonsil, unspecified - Malignant neoplasms                 | C099    | 1  |
|                | Unspecified lymphoid leukemia- Malignant neoplasms        | 2049    | 1  |
|                | Upper limb, including shoulder- Malignant neoplasms       | 1712    | 1  |
|                | Unknown                                                   | Unknown | 87 |
| Cardiac causes | Other primary cardiomyopathies                            | 4254    | 30 |
|                | Acute myocardial infarction                               | 410     | 24 |
|                | Coronary atherosclerosis                                  | 4140    | 11 |
|                | Atherosclerotic heart disease                             | I251    | 10 |
|                | Cardiac arrest                                            | 4275    | 10 |
|                | Secondary cardiomyopathy, unspecified                     | 4259    | 10 |
|                | Congestive heart failure                                  | 4280    | 8  |
|                | Cardiomyopathy, unspecified                               | I429    | 7  |
|                | Acute myocardial infarction, unspecified                  | I219    | 6  |
|                | Chronic ischemic heart disease, unspecified               | 4149    | 6  |
|                | Dilated cardiomyopathy                                    | I420    | 5  |
|                | Heart disease, unspecified                                | 4299    | 5  |
|                | Cardiovascular disease, unspecified                       | 4292    | 4  |
|                | Endocarditis, valve unspecified                           | 4249    | 4  |
|                | Other forms of heart disease                              | 425     | 4  |
|                | Aortic valve disorders                                    | 4241    | 3  |
|                | Atherosclerotic cardiovascular disease, so described      | I250    | 3  |
|                | Congestive heart failure                                  | I500    | 3  |
|                | Heart disease, unspecified                                | I519    | 3  |
|                | Myocarditis, unspecified                                  | 4290    | 3  |
|                | Other restrictive cardiomyopathy                          | I425    | 3  |
|                | Primary pulmonary hypertension                            | 4160    | 3  |
|                | Pulmonary embolism and infarction                         | 4151    | 3  |
|                | Pulmonary embolism without mention of acute cor pulmonale | I269    | 3  |
|                | Aortic valve disorder, unspecified                        | I359    | 2  |
|                | Cardiac arrest, unspecified                               | I469    | 2  |
|                | Cardiac arrhythmia, unspecified                           | I499    | 2  |
|                | Cardiac dysrhythmia, unspecified                          | 4279    | 2  |



|                  |                                                              |         |    |
|------------------|--------------------------------------------------------------|---------|----|
|                  | Cardiomegaly                                                 | I517    | 2  |
|                  | Cardiomyopathy due to drugs and other external agents        | I427    | 2  |
|                  | Endocarditis, valve unspecified                              | I38     | 2  |
|                  | Mitral (valve) insufficiency                                 | I340    | 2  |
|                  | Myocarditis, unspecified                                     | I514    | 2  |
|                  | Other acute and subacute forms of ischemic heart disease     | 411     | 2  |
|                  | Other and unspecified rheumatic aortic diseases              | 3959    | 2  |
|                  | Other secondary pulmonary hypertension                       | I272    | 2  |
|                  | Acute and subacute infective endocarditis                    | I330    | 1  |
|                  | Constrictive pericarditis                                    | 4232    | 1  |
|                  | Disorders of both mitral and aortic valves                   | I080    | 1  |
|                  | Heart failure, unspecified                                   | I509    | 1  |
|                  | Hypertrophic obstructive cardiomyopathy                      | 4251    | 1  |
|                  | Ischemic heart disease                                       | 414     | 1  |
|                  | Kyphoscoliotic heart disease                                 | 4161    | 1  |
|                  | Mitral (valve) prolapse                                      | I341    | 1  |
|                  | Mitral stenosis                                              | 3940    | 1  |
|                  | Mitral valve disease, unspecified                            | I059    | 1  |
|                  | Mitral valve disorders                                       | 4240    | 1  |
|                  | Other and unspecified rheumatic heart diseases               | 3989    | 1  |
|                  | Other hypertrophic cardiomyopathy                            | I422    | 1  |
|                  | Other specified forms of chronic ischemic heart disease      | 4148    | 1  |
|                  | Primary pulmonary hypertension                               | I270    | 1  |
|                  | Supraventricular tachycardia                                 | I471    | 1  |
|                  | Unspecified hypertensive heart disease                       | 4029    | 1  |
|                  | Unspecified disease of pericardium                           | 4239    | 1  |
|                  | Acute and subacute bacterial endocarditis                    | 4210    | 1  |
|                  | Unknown                                                      | Unknown | 27 |
| Pulmonary causes | Pneumonia, organism unspecified                              | 486     | 18 |
|                  | Postinflammatory pulmonary fibrosis                          | 515     | 12 |
|                  | Pneumonia, unspecified                                       | J189    | 10 |
|                  | Other specified alveolar and parietoalveolar pneumonopathies | 5168    | 8  |
|                  | Due to inhalation of food or vomitus                         | 5070    | 5  |
|                  | Other interstitial pulmonary diseases with fibrosis          | J841    | 5  |
|                  | Pulmonary insufficiency following trauma and surgery         | 5185    | 5  |
|                  | Chronic and other pulmonary manifestations due to radiation  | 5081    | 4  |
|                  | Other diseases of lung                                       | 5188    | 4  |
|                  | Adult respiratory distress syndrome                          | J80     | 3  |
|                  | Bronchopneumonia, organism unspecified                       | 485     | 3  |

|              |                                                                       |         |    |
|--------------|-----------------------------------------------------------------------|---------|----|
|              | Chronic airway obstruction, not elsewhere classified                  | 496     | 3  |
|              | Chronic obstructive pulmonary disease, unspecified                    | J449    | 3  |
|              | Other disorders of lung                                               | J984    | 3  |
|              | Pneumonitis due to food and vomit                                     | J690    | 3  |
|              | Interstitial pulmonary disease, unspecified                           | J849    | 2  |
|              | Other chronic bronchitis                                              | 4918    | 2  |
|              | Pneumococcal pneumonia [streptococcus pneumoniae pneumonia]           | 481     | 2  |
|              | Pneumonia due to Streptococcus pneumoniae                             | J13     | 2  |
|              | Pneumonia due to pseudomonas                                          | 4821    | 2  |
|              | Pneumonia due to streptococcus                                        | 4823    | 2  |
|              | Viral pneumonia, unspecified                                          | 4809    | 2  |
|              | Hypertrophy of tonsils                                                | J351    | 1  |
|              | Idiopathic fibrosing alveolitis                                       | 5163    | 1  |
|              | Influenza with other respiratory manifestations, virus not identified | J111    | 1  |
|              | Lobar pneumonia, unspecified                                          | J181    | 1  |
|              | Other acute sinusitis                                                 | 4618    | 1  |
|              | Other chronic sinusitis                                               | 4738    | 1  |
|              | Other diseases of mediastinum, not elsewhere classified               | 5193    | 1  |
|              | Other diseases of respiratory system                                  | 516     | 1  |
|              | Other diseases of vocal cords                                         | J383    | 1  |
|              | Other specified chronic obstructive pulmonary disease                 | J448    | 1  |
|              | Other specified forms of effusion, except tuberculous                 | 5118    | 1  |
|              | Pleural effusion, not elsewhere classified                            | J90     | 1  |
|              | Pulmonary alveolar proteinosis                                        | 5160    | 1  |
|              | Pulmonary congestion and hypostasis                                   | 514     | 1  |
|              | Respiratory failure, unspecified                                      | J969    | 1  |
|              | Unspecified pleural effusion                                          | 5119    | 1  |
|              | Without mention of fistula                                            | 5109    | 1  |
|              | Unknown                                                               | Unknown | 17 |
| Other causes | Brain, unspecified - Uncertain neoplasms                              | D432    | 26 |
|              | Unspecified septicemia                                                | 389     | 9  |
|              | Intracerebral hemorrhage                                              | 431     | 8  |
|              | Septicemia, unspecified                                               | A419    | 8  |
|              | Acquired immunodeficiency syndrome with or without other conditions   | 429     | 7  |
|              | Other specified viral hepatitis without mention of hepatic coma       | 705     | 7  |
|              | Diabetes mellitus without mention of complication                     | 2500    | 6  |
|              | Other ill-defined and unspecified causes of mortality                 | R99     | 6  |
|              | Other unknown and unspecified cause                                   | 7999    | 6  |
|              | Pneumocystosis                                                        | 1363    | 6  |

|  |                                                             |      |   |
|--|-------------------------------------------------------------|------|---|
|  | Cirrhosis of liver without mention of alcohol               | 5715 | 5 |
|  | Diseases of arteries, arterioles, and capillaries           | 440  | 5 |
|  | Obstructive hydrocephalus                                   | 3314 | 5 |
|  | Other ill-defined conditions                                | 7998 | 5 |
|  | Other specified diseases of blood and blood-forming organs  | 2898 | 5 |
|  | Acute pancreatitis                                          | 5770 | 4 |
|  | Cytomegaloviral disease                                     | 785  | 4 |
|  | HTLV-III/LAV infection causing other specified infections   | 421  | 4 |
|  | Kyphoscoliosis and scoliosis                                | 7373 | 4 |
|  | Myelodysplastic syndrome, unspecified - Uncertain neoplasms | D469 | 4 |
|  | Neurofibromatosis (nonmalignant)                            | Q850 | 4 |
|  | Renal failure, unspecified                                  | 586  | 4 |
|  | Sequelae of viral hepatitis                                 | B942 | 4 |
|  | Stroke, not specified as hemorrhage or infarction           | I64  | 4 |
|  | Unspecified renal failure                                   | N19  | 4 |
|  | Alcoholic cirrhosis of liver                                | 5712 | 3 |
|  | Brain, infratentorial - Uncertain neoplasms                 | D431 | 3 |
|  | Cerebral artery occlusion, unspecified                      | 4349 | 3 |
|  | Chickenpox                                                  | 52   | 3 |
|  | Chronic viral hepatitis C                                   | B182 | 3 |
|  | End-stage renal disease                                     | N180 | 3 |
|  | Hemorrhage of gastrointestinal tract, unspecified           | 5789 | 3 |
|  | Hypopituitarism                                             | E230 | 3 |
|  | Intracerebral hemorrhage, unspecified                       | I619 | 3 |
|  | Other and unspecified convulsions                           | R568 | 3 |
|  | Other and unspecified mycoses                               | 1179 | 3 |
|  | Other specified disorders of liver                          | 5738 | 3 |
|  | Tetraplegia, unspecified                                    | G825 | 3 |
|  | Acute renal failure, unspecified                            | N179 | 2 |
|  | Acute, but ill-defined, cerebrovascular disease             | 436  | 2 |
|  | Agranulocytosis                                             | 2880 | 2 |
|  | Alcohol dependence syndrome                                 | 303  | 2 |
|  | Aspergillosis                                               | 1173 | 2 |
|  | Brain, supratentorial - Uncertain neoplasms                 | D430 | 2 |
|  | Diabetes with ketoacidosis                                  | 2501 | 2 |
|  | Disease of gallbladder, unspecified                         | K829 | 2 |
|  | Disseminated                                                | 1125 | 2 |
|  | Down's syndrome, unspecified                                | Q909 | 2 |
|  | Dyspnea and respiratory abnormalities                       | 7860 | 2 |

|  |                                                                |      |   |
|--|----------------------------------------------------------------|------|---|
|  | Encephalopathy, unspecified                                    | 3483 | 2 |
|  | Generalized and unspecified atherosclerosis                    | I709 | 2 |
|  | HTLV-III/LAV infection with specified malignant neoplasms      | 422  | 2 |
|  | Human immunodeficiency virus infection                         | 449  | 2 |
|  | Infantile cerebral palsy, unspecified                          | G809 | 2 |
|  | Intestinal infectious diseases                                 | 79   | 2 |
|  | Meningitis due to unspecified bacterium                        | 3209 | 2 |
|  | Other and unspecified cirrhosis of liver                       | K746 | 2 |
|  | Portal hypertension                                            | 5723 | 2 |
|  | Scoliosis, unspecified                                         | M419 | 2 |
|  | Septicemia due to Streptococcus pneumoniae                     | A403 | 2 |
|  | Septicemia due to other Gram-negative organisms                | A415 | 2 |
|  | Septicemia due to other gram-negative organisms                | 384  | 2 |
|  | Status epilepticus, unspecified                                | G419 | 2 |
|  | Streptococcal septicemia                                       | 380  | 2 |
|  | Subarachnoid hemorrhage, unspecified                           | I609 | 2 |
|  | Subarachnoid hemorrhage                                        | 430  | 2 |
|  | Systemic sclerosis                                             | 7101 | 2 |
|  | Thrombocytopenia, unspecified                                  | 2875 | 2 |
|  | Tuberous sclerosis                                             | 7595 | 2 |
|  | Unspecified                                                    | 4019 | 2 |
|  | Unspecified anomaly of heart                                   | 7469 | 2 |
|  | Unspecified disorder of kidney and ureter                      | 5939 | 2 |
|  | Unspecified site                                               | 5559 | 2 |
|  | Urinary tract infection, site not specified                    | 5990 | 2 |
|  | Acute hepatitis B without delta-agent and without hepatic coma | B169 | 1 |
|  | Acute hepatitis C                                              | B171 | 1 |
|  | Acute pancreatitis                                             | K85  | 1 |
|  | Acute renal failure, unspecified                               | 5849 | 1 |
|  | Adenovirus                                                     | 790  | 1 |
|  | Agranulocytosis                                                | D70  | 1 |
|  | Alcohol abuse                                                  | 3050 | 1 |
|  | Alcohol withdrawal delirium                                    | 2910 | 1 |
|  | Alcoholic cirrhosis of liver                                   | K703 | 1 |
|  | Alcoholic hepatic failure                                      | K704 | 1 |
|  | Anomalies of spleen                                            | 7590 | 1 |
|  | Anoxic brain damage, not elsewhere classified                  | G931 | 1 |
|  | Aortic aneurysm of unspecified site, ruptured                  | I718 | 1 |
|  | Aplastic anemia, unspecified                                   | 2849 | 1 |

|  |                                                                                      |      |   |
|--|--------------------------------------------------------------------------------------|------|---|
|  | Appendicitis, unqualified                                                            | 541  | 1 |
|  | Arteritis, unspecified                                                               | I776 | 1 |
|  | Autoimmune disease, not elsewhere classified                                         | 2794 | 1 |
|  | Bipolar affective disorder, unspecified                                              | F319 | 1 |
|  | Budd-chiari syndrome                                                                 | 4530 | 1 |
|  | Calculus of gallbladder without cholecystitis                                        | K802 | 1 |
|  | Candidal septicemia                                                                  | B377 | 1 |
|  | Carotid artery                                                                       | 4331 | 1 |
|  | Cerebral infarction due to unspecified occlusion or stenosis of precerebral arteries | I632 | 1 |
|  | Cerebral infarction, unspecified                                                     | I639 | 1 |
|  | Chromosomal abnormality, unspecified                                                 | Q999 | 1 |
|  | Chronic or unspecified with perforation                                              | 5325 | 1 |
|  | Chronic renal failure                                                                | 585  | 1 |
|  | Chronic renal failure, unspecified                                                   | N189 | 1 |
|  | Cocaine abuse                                                                        | 3056 | 1 |
|  | Congenital factor viii disorder                                                      | 2860 | 1 |
|  | Congenital insufficiency of aortic valve                                             | 7464 | 1 |
|  | Congenital malformations of spleen                                                   | Q890 | 1 |
|  | Connective and other soft tissue - Uncertain neoplasms                               | D481 | 1 |
|  | Constitutional aplastic anemia                                                       | 2840 | 1 |
|  | Cord compression, unspecified                                                        | G952 | 1 |
|  | Creutzfeldt-Jakob disease - CJD                                                      | 461  | 1 |
|  | Crohn's disease, unspecified                                                         | K509 | 1 |
|  | Cutaneous abscess, furuncle and carbuncle of buttock                                 | L023 | 1 |
|  | Cystic fibrosis with pulmonary manifestations                                        | E840 | 1 |
|  | Cystic fibrosis, unspecified                                                         | E849 | 1 |
|  | Cystitis, unspecified                                                                | N309 | 1 |
|  | Defibrination syndrome                                                               | 2866 | 1 |
|  | Deficiency of cell-mediated immunity                                                 | 2791 | 1 |
|  | Degenerative disease of nervous system, unspecified                                  | G319 | 1 |
|  | Diabetes with neurological manifestations                                            | 2506 | 1 |
|  | Disease of blood and blood-forming organs, unspecified                               | D759 | 1 |
|  | Disease of spleen, unspecified                                                       | D739 | 1 |
|  | Disorder of kidney and ureter, unspecified                                           | N289 | 1 |
|  | Disorder of vein, unspecified                                                        | I879 | 1 |
|  | Disorders of thyroid gland                                                           | 240  | 1 |
|  | Disorders of urea cycle metabolism                                                   | E722 | 1 |
|  | Down's syndrome                                                                      | 7580 | 1 |

|  |                                                                                                                 |      |   |
|--|-----------------------------------------------------------------------------------------------------------------|------|---|
|  | Eating disorder, unspecified                                                                                    | F509 | 1 |
|  | Encephalopathy, unspecified                                                                                     | G934 | 1 |
|  | Eosinophilia                                                                                                    | 2883 | 1 |
|  | Epilepsy, unspecified                                                                                           | 3459 | 1 |
|  | Esophageal varices with bleeding                                                                                | 4560 | 1 |
|  | Essential (primary) hypertension                                                                                | I10  | 1 |
|  | Gastric ulcer, unspecified as acute or chronic, without hemorrhage or perforation                               | K259 | 1 |
|  | Gastroenteritis and colitis due to radiation                                                                    | K520 | 1 |
|  | Gastrointestinal hemorrhage, unspecified                                                                        | K922 | 1 |
|  | HIV disease resulting in multiple infections                                                                    | B207 | 1 |
|  | HIV disease resulting in other infectious and parasitic diseases                                                | B208 | 1 |
|  | Hemorrhage, unspecified                                                                                         | 4590 | 1 |
|  | Hepatic coma                                                                                                    | 5722 | 1 |
|  | Hepatitis, unspecified                                                                                          | 5733 | 1 |
|  | Hepatorenal syndrome                                                                                            | 5724 | 1 |
|  | Hereditary progressive muscular dystrophy                                                                       | 3591 | 1 |
|  | Herpes simplex without mention of complication                                                                  | 549  | 1 |
|  | Hydrocephalus, unspecified                                                                                      | G919 | 1 |
|  | Hyperosmolality and/or hypernatremia                                                                            | 2760 | 1 |
|  | Hyperpotassemia                                                                                                 | 2767 | 1 |
|  | Hypertensive disease                                                                                            | 403  | 1 |
|  | Hypertensive renal disease with renal failure                                                                   | I120 | 1 |
|  | Hypoplasia and dysplasia of lung                                                                                | Q336 | 1 |
|  | Hypotension, unspecified                                                                                        | 4589 | 1 |
|  | Ileus, unspecified                                                                                              | K567 | 1 |
|  | Ill-defined and unknown causes of morbidity and mortality                                                       | 799  | 1 |
|  | Immunodeficiency following hereditary defective response to                                                     | D823 | 1 |
|  | Infantile cerebral palsy, unspecified                                                                           | 3439 | 1 |
|  | Infectious mononucleosis                                                                                        | 75   | 1 |
|  | Insulin-dependent diabetes mellitus, without complications                                                      | E109 | 1 |
|  | Intracranial and intraspinal phlebitis and thrombophlebitis                                                     | G08  | 1 |
|  | Intracranial hemorrhage (nontraumatic), unspecified                                                             | I629 | 1 |
|  | Ischaemic infarction of muscle                                                                                  | M622 | 1 |
|  | Late effects of cerebrovascular disease                                                                         | 438  | 1 |
|  | Meninges, unspecified - Uncertain neoplasms                                                                     | D429 | 1 |
|  | Meningitis, unspecified                                                                                         | 3229 | 1 |
|  | Meningococcal meningitis                                                                                        | 360  | 1 |
|  | Mental and behavioural disorders due to multiple drug use and use of other psychoactive substances, harmful use | F191 | 1 |

|  |                                                                                                                              |      |   |
|--|------------------------------------------------------------------------------------------------------------------------------|------|---|
|  | Mental and behavioural disorders due to use of alcohol, dependence syndrome                                                  | F102 | 1 |
|  | Motor neuron disease                                                                                                         | 3352 | 1 |
|  | Multiple sclerosis                                                                                                           | 340  | 1 |
|  | Myoclonus                                                                                                                    | 3332 | 1 |
|  | Myotonic disorders                                                                                                           | 3592 | 1 |
|  | Necrotizing fasciitis                                                                                                        | M726 | 1 |
|  | Neoplasm of uncertain or unknown behaviour of lymphoid, haematopoietic and related tissue, unspecified - Uncertain neoplasms | D479 | 1 |
|  | Neuronal ceroid lipofuscinosis                                                                                               | E754 | 1 |
|  | Obesity                                                                                                                      | 2780 | 1 |
|  | Obesity, unspecified                                                                                                         | E669 | 1 |
|  | Obstructive and reflux uropathy, unspecified                                                                                 | N139 | 1 |
|  | Esophageal varices with bleeding                                                                                             | I850 | 1 |
|  | Of deep vessels of lower extremities                                                                                         | 4511 | 1 |
|  | Of unspecified site                                                                                                          | 1129 | 1 |
|  | Of vena cava                                                                                                                 | 4532 | 1 |
|  | Opioid type dependence                                                                                                       | 3040 | 1 |
|  | Other and unspecified complications of the puerperium, not elsewhere classified                                              | 674  | 1 |
|  | Other and unspecified intestinal obstruction                                                                                 | K566 | 1 |
|  | Other and unspecified special symptoms or syndromes, not elsewhere classified                                                | 3079 | 1 |
|  | Other anomalies of aorta                                                                                                     | 7472 | 1 |
|  | Other anomalies of ribs and sternum                                                                                          | 7563 | 1 |
|  | Other autoimmune haemolytic anaemias                                                                                         | D591 | 1 |
|  | Other conditions of brain                                                                                                    | 3488 | 1 |
|  | Other diseases of spleen                                                                                                     | 2895 | 1 |
|  | Other forms of systemic sclerosis                                                                                            | M348 | 1 |
|  | Other histiocytosis syndromes                                                                                                | D763 | 1 |
|  | Other pulmonary aspergillosis                                                                                                | B441 | 1 |
|  | Other sequelae of chronic liver disease                                                                                      | 5728 | 1 |
|  | Other specified anomalies of muscle, tendon, fascia, and connective tissue                                                   | 7568 | 1 |
|  | Other specified anomalies of spinal cord                                                                                     | 7425 | 1 |
|  | Other specified congenital malformations                                                                                     | Q898 | 1 |
|  | Other specified diseases and conditions complicating pregnancy, childbirth and the puerperium                                | O998 | 1 |
|  | Other specified diseases of oesophagus                                                                                       | K228 | 1 |
|  | Other specified disorders of biliary tract                                                                                   | 5768 | 1 |
|  | Other specified disorders of brain                                                                                           | G938 | 1 |
|  | Other specified disorders of intestine                                                                                       | 5698 | 1 |
|  | Other specified disorders of metabolism                                                                                      | 2778 | 1 |

|  |                                                               |      |   |
|--|---------------------------------------------------------------|------|---|
|  | Other specified disorders of stomach and duodenum             | 5378 | 1 |
|  | Other specified general symptoms and signs                    | R688 | 1 |
|  | Other specified infectious and parasitic diseases             | 1368 | 1 |
|  | Other specified intestinal obstruction                        | 5608 | 1 |
|  | Other specified sites - Uncertain neoplasms                   | D487 | 1 |
|  | Other spinocerebellar diseases                                | 3348 | 1 |
|  | Other suppurative peritonitis                                 | 5672 | 1 |
|  | Other symptoms involving nervous and musculoskeletal systems  | 7819 | 1 |
|  | Pectus excavatum                                              | Q676 | 1 |
|  | Pneumococcal septicemia [streptococcus pneumoniae septicemia] | 382  | 1 |
|  | Polymyositis                                                  | 7104 | 1 |
|  | Postmeasles pneumonia                                         | 551  | 1 |
|  | Quadriplegia and quadriplegia                                 | 3440 | 1 |
|  | Secondary thrombocytopenia                                    | 2874 | 1 |
|  | Septicemia due to Staphylococcus aureus                       | A410 | 1 |
|  | Sickle-cell anemia                                            | 2826 | 1 |
|  | Sleep apnea                                                   | G473 | 1 |
|  | Spinal muscular atrophy                                       | 3351 | 1 |
|  | Staphylococcus                                                | 411  | 1 |
|  | Streptococcal infection, unspecified                          | A491 | 1 |
|  | Subarachnoid hemorrhage                                       | 4301 | 1 |
|  | Subdural hemorrhage                                           | 4321 | 1 |
|  | Systemic lupus erythematosus, unspecified                     | M329 | 1 |
|  | Thoracic aneurysm, ruptured                                   | 4411 | 1 |
|  | Thrombotic microangiopathy                                    | 4466 | 1 |
|  | Unspecified                                                   | 4379 | 1 |
|  | Unspecified cause of encephalitis                             | 3239 | 1 |
|  | Unspecified diabetes mellitus, with ketoacidosis              | E141 | 1 |
|  | Unspecified diseases due to mycobacteria                      | 319  | 1 |
|  | Unspecified diseases of blood and blood-forming organs        | 2899 | 1 |
|  | Unspecified hemorrhagic conditions                            | 2879 | 1 |
|  | Unspecified human immunodeficiency virus [HIV] disease        | B24  | 1 |
|  | Unspecified immunity deficiency                               | 2793 | 1 |
|  | Unspecified intestinal obstruction                            | 5609 | 1 |
|  | Unspecified intracranial hemorrhage                           | 4329 | 1 |
|  | Unspecified mental retardation                                | F79  | 1 |
|  | Unspecified mycosis                                           | B49  | 1 |
|  | Unspecified peritonitis                                       | 5679 | 1 |
|  | Unspecified senile psychotic condition                        | 2909 | 1 |



|                 |                                                                                                                      |         |    |
|-----------------|----------------------------------------------------------------------------------------------------------------------|---------|----|
|                 | Unspecified viral and chlamydial infections                                                                          | 799     | 1  |
|                 | Unspecified viral encephalitis                                                                                       | A86     | 1  |
|                 | Vascular disorder of intestine, unspecified                                                                          | K559    | 1  |
|                 | Viral encephalitis transmitted by other and unspecified arthropods                                                   | 64      | 1  |
|                 | Waterhouse-Friderichsen syndrome                                                                                     | A391    | 1  |
|                 | With lesion of tubular necrosis                                                                                      | 5845    | 1  |
|                 | Unknown                                                                                                              | Unknown | 57 |
| External causes | Person injured in unspecified motor-vehicle accident, traffic                                                        | V892    | 13 |
|                 | Driver of motor vehicle other than motor                                                                             | E8160   | 9  |
|                 | Other and unspecified firearm                                                                                        | E9554   | 9  |
|                 | Unspecified drugs                                                                                                    | E8589   | 9  |
|                 | Driver of motor vehicle other than motorcycle                                                                        | E8120   | 8  |
|                 | Motor vehicle traffic accidents                                                                                      | E812    | 8  |
|                 | Handgun                                                                                                              | E9550   | 7  |
|                 | Motor vehicle traffic accidents                                                                                      | E819    | 7  |
|                 | Other and unspecified firearm                                                                                        | E9654   | 7  |
|                 | Pedestrian                                                                                                           | E8147   | 7  |
|                 | Unspecified person of motor vehicle traffic accident of unspecified nature                                           | E8199   | 7  |
|                 | Assault by other and unspecified firearm discharge                                                                   | X95     | 6  |
|                 | Poisoning by and exposure to other and unspecified drugs, medicaments and biological substances, undetermined intent | Y14     | 6  |
|                 | Shotgun                                                                                                              | E9551   | 6  |
|                 | Driver of motor vehicle other than motorcycle                                                                        | E8150   | 5  |
|                 | Other specified procedures                                                                                           | E8798   | 5  |
|                 | Accidental poisoning by and exposure to narcotics and psychodysleptics [hallucinogens], not elsewhere classified     | X42     | 4  |
|                 | Accidental poisoning by and exposure to other and unspecified drugs, medicaments and biological substances           | X44     | 4  |
|                 | Exposure to unspecified factor                                                                                       | X59     | 4  |
|                 | Intentional self-harm by other and unspecified firearm discharge                                                     | X74     | 4  |
|                 | Other medical procedures                                                                                             | Y848    | 4  |
|                 | Passenger in motor vehicle other than motorcycle                                                                     | E8121   | 4  |
|                 | Unspecified person                                                                                                   | E8159   | 4  |
|                 | Car occupant injured in collision with car, pick-up truck or van, passenger injured in traffic accident              | V436    | 3  |
|                 | Motor vehicle traffic accidents                                                                                      | E818    | 3  |
|                 | Other and unspecified fall                                                                                           | E888    | 3  |
|                 | Passenger in motor vehicle other than mo                                                                             | E8161   | 3  |
|                 | Person injured in collision between other specified motor vehicles (traffic)                                         | V877    | 3  |
|                 | Striking by blunt or thrown object                                                                                   | E9682   | 3  |
|                 | Suicide and self-inflicted injury                                                                                    | E955    | 3  |
|                 | Unspecified suicide and self-inflicted injury                                                                        | E9559   | 3  |

|  |                                                                                                                                                   |       |   |
|--|---------------------------------------------------------------------------------------------------------------------------------------------------|-------|---|
|  | Unspecified fall                                                                                                                                  | W19   | 3 |
|  | Unspecified firearm missile                                                                                                                       | E9229 | 3 |
|  | Unspecified person of other motor vehicle traffic accident involving collision with motor vehicle                                                 | E8129 | 3 |
|  | Unspecified person of other noncollision motor vehicle traffic accident                                                                           | E8189 | 3 |
|  | Accidental poisoning by and exposure to nonopioid analgesics, antipyretics and antirheumatics                                                     | X40   | 2 |
|  | Burning caused by conflagration                                                                                                                   | E8903 | 2 |
|  | Car occupant injured in collision with car, pick-up truck or van, driver injured in traffic accident                                              | V435  | 2 |
|  | Car occupant injured in noncollision transport accident, driver injured in traffic accident                                                       | V485  | 2 |
|  | Drowning and submersion while in bath-tub                                                                                                         | W65   | 2 |
|  | In bathtub                                                                                                                                        | E9104 | 2 |
|  | Inhalation and ingestion of food causing obstruction of respiratory tract or suffocation                                                          | E911  | 2 |
|  | Intentional self-harm by hanging, strangulation and suffocation                                                                                   | X70   | 2 |
|  | Intentional self-harm by rifle, shotgun and larger firearm discharge                                                                              | X73   | 2 |
|  | Intentional self-poisoning by and exposure to antiepileptic, sedative-hypnotic, antiparkinsonism and psychotropic drugs, not elsewhere classified | X61   | 2 |
|  | Motor vehicle exhaust gas                                                                                                                         | E9520 | 2 |
|  | Motorcyclist                                                                                                                                      | E8122 | 2 |
|  | Occupant of pick-up truck or van injured in noncollision transport accident, driver injured in traffic accident                                   | V585  | 2 |
|  | Opiates and related narcotics                                                                                                                     | E8500 | 2 |
|  | Passenger in motor vehicle other than motorcycle                                                                                                  | E8151 | 2 |
|  | Psychodysleptics (hallucinogens)                                                                                                                  | E8541 | 2 |
|  | Unspecified accidental poisoning by analgesics, antipyretics, and antirheumatics                                                                  | E8509 | 2 |
|  | Unspecified drowning and submersion                                                                                                               | W74   | 2 |
|  | Accidental poisoning by and exposure to alcohol                                                                                                   | X45   | 1 |
|  | Accidental poisoning by and exposure to other gases and vapours                                                                                   | X47   | 1 |
|  | Accidental poisoning by drugs, medicinal substances, and biologicals                                                                              | E850  | 1 |
|  | Accidental poisoning by other solid and liquid substances, gases, and vapors                                                                      | E869  | 1 |
|  | Accidents caused by submersion, suffocation, and foreign bodies                                                                                   | E910  | 1 |
|  | Assault by cutting and piercing instrument                                                                                                        | E966  | 1 |
|  | Assault by drugs, medicaments and biological substances                                                                                           | X85   | 1 |
|  | Assault by hanging and strangulation                                                                                                              | E963  | 1 |
|  | Assault by sharp object                                                                                                                           | X99   | 1 |
|  | Burns, fire                                                                                                                                       | E9581 | 1 |
|  | By nuclear weapons                                                                                                                                | E9963 | 1 |
|  | Car occupant [any] injured in unspecified traffic accident                                                                                        | V499  | 1 |
|  | Car occupant injured in collision with fixed or stationary object, driver injured in traffic accident                                             | V475  | 1 |
|  | Car occupant injured in collision with fixed or stationary object, passenger injured in traffic accident                                          | V476  | 1 |

|  |                                                                                                                             |       |   |
|--|-----------------------------------------------------------------------------------------------------------------------------|-------|---|
|  | Car occupant injured in noncollision transport accident, unspecified car occupant injured in traffic accident               | V489  | 1 |
|  | Contact with other specified venomous arthropods                                                                            | X25   | 1 |
|  | Contaminated substance transfused or infused                                                                                | E8750 | 1 |
|  | Domestic wiring and appliances                                                                                              | E9250 | 1 |
|  | Driver of motor vehicle other than motorcycle                                                                               | E8190 | 1 |
|  | Driver of motor vehicle other than motorcycle                                                                               | E8250 | 1 |
|  | Drowning and submersion while in natural water                                                                              | W69   | 1 |
|  | Exposure to uncontrolled fire in building or structure                                                                      | X00   | 1 |
|  | Fall from chair or bed                                                                                                      | E8842 | 1 |
|  | Fall from cliff                                                                                                             | W15   | 1 |
|  | Fall on and from stairs and steps                                                                                           | W10   | 1 |
|  | Fire                                                                                                                        | E9680 | 1 |
|  | Handgun                                                                                                                     | E9650 | 1 |
|  | Handgun                                                                                                                     | E9850 | 1 |
|  | Hanging                                                                                                                     | E9530 | 1 |
|  | Hunting rifle                                                                                                               | E9552 | 1 |
|  | Hunting rifle                                                                                                               | E9652 | 1 |
|  | Inhalation and ingestion of other object causing obstruction of respiratory tract or suffocation                            | E912  | 1 |
|  | Inhalation and ingestion of other objects causing obstruction of respiratory tract                                          | W80   | 1 |
|  | Intentional self-harm by handgun discharge                                                                                  | X72   | 1 |
|  | Intentional self-poisoning by and exposure to narcotics and psychodysleptics [hallucinogens], not elsewhere classified      | X62   | 1 |
|  | Intentional self-poisoning by and exposure to other and unspecified drugs, medicaments and biological substances            | X64   | 1 |
|  | Late effects of injury purposely inflicted by other person                                                                  | E969  | 1 |
|  | Late effects of self-inflicted injury                                                                                       | E9598 | 1 |
|  | Local anesthetics                                                                                                           | E8552 | 1 |
|  | Mixed sedatives, not elsewhere classified                                                                                   | E8525 | 1 |
|  | Motor vehicle nontraffic accidents                                                                                          | 8E21  | 1 |
|  | Motorcycle rider injured in collision with fixed or stationary object, driver injured in traffic accident                   | V274  | 1 |
|  | Motorcycle rider injured in noncollision transport accident, driver injured in traffic accident                             | V284  | 1 |
|  | Motorcyclist                                                                                                                | E8152 | 1 |
|  | Occupant of pick-up truck or van injured in collision with car, pick-up truck or van, driver injured in traffic accident    | V535  | 1 |
|  | Occupant of pick-up truck or van injured in collision with car, pick-up truck or van, passenger injured in traffic accident | V536  | 1 |
|  | Other accidental drowning or submersion                                                                                     | E9108 | 1 |
|  | Other accidents                                                                                                             | E928  | 1 |
|  | Other and unspecified                                                                                                       | E8869 | 1 |
|  | Other carbon monoxide                                                                                                       | E9521 | 1 |
|  | Other man-made structures                                                                                                   | E9571 | 1 |

|  |                                                                                                               |         |    |
|--|---------------------------------------------------------------------------------------------------------------|---------|----|
|  | Other road vehicle accidents                                                                                  | E826    | 1  |
|  | Other specified drugs                                                                                         | E8588   | 1  |
|  | Other specified drugs and medicinal substances                                                                | E9504   | 1  |
|  | Passenger in motor vehicle other than motorcycle                                                              | E8191   | 1  |
|  | Pedal cyclist                                                                                                 | E8136   | 1  |
|  | Pedestrian injured in collision with car, pick-up truck or van, traffic accident                              | V031    | 1  |
|  | Person injured in unspecified vehicle accident                                                                | V899    | 1  |
|  | Radiological procedure and radiotherapy                                                                       | E8792   | 1  |
|  | Radiological procedure and radiotherapy                                                                       | Y842    | 1  |
|  | Sequelae of other accidents                                                                                   | Y86     | 1  |
|  | Submersion (drowning), undetermined whether accidentally or purposely inflicted                               | E984    | 1  |
|  | Suicide and self-inflicted injury                                                                             | E952    | 1  |
|  | Suicide and self-inflicted injury                                                                             | E953    | 1  |
|  | Suicide and self-inflicted injury by cutting and piercing instrument                                          | E956    | 1  |
|  | Surgical and medical procedures as the cause of abnormal reaction of patient or later complication            | E878    | 1  |
|  | Surgical operation with formation of external stoma                                                           | E8783   | 1  |
|  | Surgical operation with transplant of whole organ                                                             | Y830    | 1  |
|  | Tranquilizers and other psychotropic agents                                                                   | E9503   | 1  |
|  | Unspecified drug or medicinal substance                                                                       | E9805   | 1  |
|  | Unspecified means , undetermined whether accidentally or purposely inflicted                                  | E9889   | 1  |
|  | Unspecified person of motor vehicle traffic accident due to loss of control, without collision on the highway | E8169   | 1  |
|  | Unspecified person of other accidental submersion or drowning in water transport accident                     | E8329   | 1  |
|  | Unspecified person of other and unspecified water transport accident                                          | E8389   | 1  |
|  | Unspecified site, falling from high place, undetermined whether accidentally or purposely inflicted           | E9879   | 1  |
|  | While engaged in other sport or recreational activity without diving equipment                                | E9102   | 1  |
|  | Unknown                                                                                                       | Unknown | 44 |

Table S5. Relative rates for mortality among five-year survivors of childhood cancer

|                              | All cause |             | Health-related Cause |             | Subsequent Neoplasm |             | Cardiac Cause |             | Pulmonary Cause |              | Other Health-related Causes |             |
|------------------------------|-----------|-------------|----------------------|-------------|---------------------|-------------|---------------|-------------|-----------------|--------------|-----------------------------|-------------|
|                              | RR        | 95%CI       | RR                   | 95%CI       | RR                  | 95%CI       | RR            | 95%CI       | RR              | 95%CI        | RR                          | 95%CI       |
| Treatment Era                |           |             |                      |             |                     |             |               |             |                 |              |                             |             |
| Per five years               | 0.83      | 0.81 - 0.85 | 0.86                 | 0.82 - 0.89 | 0.83                | 0.78 - 0.88 | 0.77          | 0.68 - 0.86 | 0.77            | 0.66 - 0.89  | 0.97                        | 0.90 - 1.05 |
| Sex                          |           |             |                      |             |                     |             |               |             |                 |              |                             |             |
| Male                         | 1.0       |             | 1.0                  |             | 1.0                 |             | 1.0           |             | 1.0             |              | 1.0                         |             |
| Female                       | 0.85      | 0.80 - 0.90 | 0.99                 | 0.90 - 1.09 | 1.12                | 0.96 - 1.30 | 0.80          | 0.61 - 1.05 | 0.99            | 0.70 - 1.39  | 0.90                        | 0.75 - 1.09 |
| Diagnosis                    |           |             |                      |             |                     |             |               |             |                 |              |                             |             |
| Acute lymphoblastic leukemia | 1.0       |             | 1.0                  |             | 1.0                 |             | 1.0           |             | 1.0             |              | 1.0                         |             |
| Acute myeloid leukemia       | 1.10      | 0.91 - 1.32 | 1.44                 | 1.06 - 1.94 | 0.68                | 0.38 - 1.23 | 2.00          | 0.85 - 4.73 | 3.23            | 1.43 - 7.30  | 2.13                        | 1.34 - 3.41 |
| Other leukemia               | 2.58      | 2.13 - 3.12 | 2.20                 | 1.54 - 3.16 | 1.11                | 0.55 - 2.25 | 3.59          | 1.37 - 9.42 | 7.31            | 3.17 - 16.82 | 2.33                        | 1.15 - 4.72 |
| Astrocytoma                  | 1.35      | 1.21 - 1.50 | 1.56                 | 1.31 - 1.86 | 1.23                | 0.94 - 1.62 | 1.33          | 0.73 - 2.43 | 2.47            | 1.38 - 4.42  | 1.97                        | 1.44 - 2.70 |
| Medulloblastoma              | 2.19      | 1.90 - 2.51 | 2.01                 | 1.55 - 2.60 | 2.61                | 1.89 - 3.61 | 0.65          | 0.16 - 2.71 | 1.10            | 0.33 - 3.66  | 1.66                        | 1.01 - 2.75 |
| Other CNS tumors             | 1.58      | 1.34 - 1.87 | 1.92                 | 1.46 - 2.53 | 1.92                | 1.30 - 2.82 | 0.69          | 0.17 - 2.82 | 1.23            | 0.37 - 4.16  | 2.52                        | 1.60 - 3.96 |
| Hodgkin lymphoma             | 1.02      | 0.91 - 1.13 | 1.67                 | 1.41 - 1.98 | 1.64                | 1.27 - 2.12 | 3.12          | 1.95 - 5.00 | 1.58            | 0.85 - 2.93  | 1.22                        | 0.88 - 1.70 |
| Non-Hodgkin lymphoma         | 0.63      | 0.54 - 0.73 | 1.16                 | 0.94 - 1.43 | 1.09                | 0.79 - 1.50 | 1.89          | 1.07 - 3.33 | 1.03            | 0.48 - 2.23  | 1.08                        | 0.74 - 1.58 |
| Wilms tumor                  | 0.52      | 0.44 - 0.62 | 0.80                 | 0.62 - 1.02 | 0.56                | 0.38 - 0.82 | 1.82          | 0.97 - 3.40 | 0.73            | 0.26 - 2.04  | 0.95                        | 0.62 - 1.46 |
| Neuroblastoma                | 0.67      | 0.57 - 0.79 | 0.60                 | 0.44 - 0.81 | 0.37                | 0.22 - 0.60 | 0.56          | 0.19 - 1.61 | 1.92            | 0.87 - 4.24  | 0.80                        | 0.47 - 1.33 |
| Soft tissue sarcoma          | 0.83      | 0.70 - 0.97 | 1.09                 | 0.85 - 1.41 | 1.14                | 0.80 - 1.62 | 0.96          | 0.42 - 2.22 | 0.38            | 0.09 - 1.61  | 1.26                        | 0.81 - 1.95 |
| Ewing sarcoma                | 1.56      | 1.33 - 1.83 | 1.40                 | 1.04 - 1.88 | 1.20                | 0.75 - 1.90 | 3.56          | 1.84 - 6.89 | 0.30            | 0.04 - 2.24  | 1.26                        | 0.72 - 2.21 |
| Osteosarcoma                 | 0.98      | 0.84 - 1.13 | 0.92                 | 0.71 - 1.19 | 0.83                | 0.56 - 1.23 | 1.18          | 0.58 - 2.37 | 0.83            | 0.33 - 2.08  | 1.03                        | 0.64 - 1.66 |
| Other bone tumors            | 0.53      | 0.31 - 0.92 | 0.44                 | 0.16 - 1.17 | 0.67                | 0.21 - 2.12 | 0.00          | 0.00 - .    | 0.00            | 0.00 - .     | 0.37                        | 0.05 - 2.69 |
| Age at diagnosis             |           |             |                      |             |                     |             |               |             |                 |              |                             |             |
| 0-4                          | 1.0       |             | 1.0                  |             | 1.0                 |             | 1.0           |             | 1.0             |              | 1.0                         |             |
| 5-9                          | 1.70      | 1.55 - 1.88 | 1.19                 | 1.02 - 1.39 | 1.00                | 0.79 - 1.25 | 1.06          | 0.66 - 1.71 | 1.82            | 1.03 - 3.21  | 1.44                        | 1.08 - 1.91 |
| 10-14                        | 2.93      | 2.61 - 3.28 | 1.41                 | 1.17 - 1.69 | 1.40                | 1.08 - 1.82 | 1.37          | 0.82 - 2.31 | 2.04            | 1.09 - 3.82  | 1.31                        | 0.93 - 1.86 |
| 15-20                        | 4.73      | 4.16 - 5.39 | 1.69                 | 1.39 - 2.07 | 1.76                | 1.28 - 2.40 | 1.65          | 0.94 - 2.90 | 2.39            | 1.17 - 4.87  | 1.49                        | 1.02 - 2.17 |

**Table S6. All-cause and cause-specific standard mortality ratios in five-year survivors of childhood cancer followed for 15 years**

|                               | All cause    |      |             | Health-related Cause |      |             | Subsequent Neoplasm |      |             | Cardiac Causes |      |             | Pulmonary Causes |       |              | Other Health-related Causes |      |            |
|-------------------------------|--------------|------|-------------|----------------------|------|-------------|---------------------|------|-------------|----------------|------|-------------|------------------|-------|--------------|-----------------------------|------|------------|
|                               | No. of death | SMR  | 95%CI       | No. of death         | SMR  | 95%CI       | No. of death        | SMR  | 95%CI       | No. of death   | SMR  | 95%CI       | No. of death     | SMR   | 95%CI        | No. of death                | SMR  | 95%CI      |
| All survivors                 | 2960         | 12.8 | 12.3 - 13.3 | 906                  | 12.8 | 11.9 - 13.7 | 455                 | 25.0 | 22.6 - 27.7 | 97             | 11.7 | 9.4 - 14.4  | 77               | 17.7  | 13.8 - 22.6  | 276                         | 6.9  | 6.1 - 7.8  |
| Treatment Era                 |              |      |             |                      |      |             |                     |      |             |                |      |             |                  |       |              |                             |      |            |
| 1970-1979                     | 1059         | 14.0 | 13.2 - 14.9 | 314                  | 13.7 | 12.2 - 15.4 | 160                 | 26.3 | 22.2 - 31.3 | 44             | 16.7 | 12.0 - 23.2 | 30               | 21.4  | 14.4 - 32.0  | 80                          | 6.2  | 4.9 - 7.9  |
| 1980-1989                     | 1179         | 12.1 | 11.4 - 12.8 | 376                  | 12.2 | 11.0 - 13.5 | 203                 | 26.3 | 22.8 - 30.4 | 41             | 11.2 | 8.2 - 15.3  | 33               | 17.5  | 12.2 - 25.0  | 100                         | 5.6  | 4.6 - 6.9  |
| 1990-1999                     | 722          | 12.3 | 11.5 - 13.3 | 216                  | 12.5 | 10.9 - 14.4 | 92                  | 20.9 | 16.9 - 25.9 | 13             | 6.2  | 3.5 - 10.9  | 14               | 12.9  | 7.4 - 22.5   | 97                          | 10.  | 8.2 - 12.2 |
| Sex                           |              |      |             |                      |      |             |                     |      |             |                |      |             |                  |       |              |                             |      |            |
| Male                          | 1755         | 10.0 | 9.6 - 10.5  | 507                  | 10.9 | 9.9 - 11.9  | 250                 | 22.8 | 19.8 - 26.2 | 58             | 9.8  | 7.4 - 13.1  | 42               | 15.9  | 11.4 - 22.2  | 157                         | 5.8  | 4.9 - 6.8  |
| Female                        | 1205         | 21.2 | 20.1 - 22.5 | 399                  | 16.4 | 14.8 - 18.1 | 206                 | 28.4 | 24.7 - 32.6 | 39             | 16.1 | 11.6 - 22.2 | 35               | 20.4  | 14.3 - 29.1  | 119                         | 9.2  | 7.6 - 11.1 |
| Diagnosis                     |              |      |             |                      |      |             |                     |      |             |                |      |             |                  |       |              |                             |      |            |
| Acute lymphoblastic leukemia  | 979          | 15.2 | 14.3 - 16.2 | 276                  | 14.9 | 13.1 - 16.9 | 153                 | 31.0 | 25.8 - 37.2 | 17             | 8.5  | 5.1 - 14.4  | 18               | 14.6  | 8.9 - 24.2   | 87                          | 8.4  | 6.8 - 10.6 |
| Acute myeloid leukemia        | 86           | 13.3 | 10.8 - 16.5 | 27                   | 12.7 | 8.5 - 19.2  | 5                   | 8.8  | 3.2 - 24.3  | 4              | 15.7 | 5.3 - 46.5  | 5                | 41.2  | 16.9 - 100.2 | 13                          | 10.6 | 5.8 - 19.5 |
| Other leukemia                | 97           | 35.1 | 28.8 - 42.8 | 23                   | 27.5 | 18.1 - 41.8 | 8                   | 35.6 | 16.9 - 74.7 | 3              | 24.9 | 6.2 - 99.5  | 7                | 139.2 | 63.6 - 305.1 | 6                           | 12.0 | 5.1 - 28.6 |
| Astrocytoma                   | 344          | 14.8 | 13.3 - 16.5 | 105                  | 15.3 | 12.5 - 18.7 | 46                  | 26.2 | 19.4 - 35.4 | 7              | 9.0  | 4.3 - 18.8  | 13               | 29.1  | 15.7 - 54.1  | 39                          | 10.0 | 7.2 - 14.0 |
| Medulloblastoma, PNET         | 200          | 27.1 | 23.6 - 31.1 | 45                   | 22.4 | 16.7 - 30.1 | 31                  | 60.4 | 42.4 - 86.0 | 2              | 9.5  | 2.4 - 37.8  | 2                | 15.4  | 3.9 - 61.6   | 10                          | 8.4  | 4.3 - 16.5 |
| Other CNS tumors              | 119          | 18.4 | 15.4 - 22.0 | 43                   | 22.1 | 16.1 - 30.2 | 23                  | 47.0 | 31.0 - 71.1 | 1              | 5.2  | 0.8 - 36.1  | 2                | 17.8  | 4.4 - 71.2   | 17                          | 15.2 | 9.1 - 25.2 |
| Hodgkin disease               | 352          | 8.6  | 7.7 - 9.5   | 155                  | 11.2 | 9.5 - 13.2  | 77                  | 22.5 | 17.9 - 28.1 | 30             | 16.5 | 11.4 - 23.9 | 16               | 21.0  | 12.4 - 35.5  | 32                          | 4.1  | 2.9 - 5.9  |
| Non-Hodgkin lymphoma          | 133          | 5.5  | 4.7 - 6.5   | 71                   | 10.3 | 8.1 - 13.1  | 36                  | 21.9 | 15.6 - 30.8 | 8              | 9.1  | 4.4 - 18.5  | 3                | 8.4   | 2.7 - 25.8   | 24                          | 6.0  | 3.9 - 9.1  |
| Wilms tumor                   | 83           | 7.0  | 5.6 - 8.7   | 30                   | 8.2  | 5.7 - 11.8  | 13                  | 12.2 | 6.9 - 21.7  | 7              | 21.0 | 10.0 - 44.1 | 0                | 0.0   | 0.0 - 13.5   | 10                          | 4.9  | 2.6 - 9.4  |
| Neuroblastoma                 | 136          | 17.2 | 14.6 - 20.4 | 27                   | 9.5  | 6.3 - 14.2  | 11                  | 12.6 | 6.8 - 23.6  | 2              | 8.4  | 2.1 - 33.7  | 4                | 20.3  | 7.4 - 56.1   | 10                          | 6.3  | 3.2 - 12.5 |
| Soft tissue sarcoma           | 92           | 8.6  | 7.0 - 10.5  | 30                   | 9.3  | 6.4 - 13.5  | 18                  | 22.5 | 14.0 - 36.0 | 3              | 8.5  | 2.7 - 26.4  | 0                | 0.0   | 0.0 - 18.5   | 8                           | 4.4  | 2.1 - 9.3  |
| Ewings sarcoma                | 145          | 18.6 | 15.8 - 21.9 | 34                   | 13.9 | 9.8 - 19.7  | 17                  | 29.2 | 18.0 - 47.6 | 8              | 26.2 | 12.1 - 56.6 | 0                | 0.0   | 0.0 - 27.0   | 8                           | 6.0  | 2.9 - 12.4 |
| Osteosarcoma                  | 185          | 11.5 | 9.9 - 13.2  | 39                   | 7.1  | 5.2 - 9.8   | 16                  | 12.5 | 7.3 - 21.4  | 4              | 6.2  | 2.4 - 16.4  | 6                | 22.1  | 9.8 - 49.4   | 12                          | 3.8  | 2.0 - 7.1  |
| Other bone tumors             | 9            | 6.1  | 3.2 - 11.8  | 3                    | 5.6  | 1.8 - 17.5  | 2                   | 15.7 | 3.9 - 62.7  | 0              | 0.0  | 0.0 - 51.8  | 0                | 0.0   | 0.0 - 134.6  | 1                           | 3.3  | 0.5 - 23.1 |
| Year since original diagnosis |              |      |             |                      |      |             |                     |      |             |                |      |             |                  |       |              |                             |      |            |
| 5-9                           | 2019         | 20.8 | 19.9 - 21.7 | 514                  | 17.6 | 16.0 - 19.4 | 269                 | 33.7 | 29.5 - 38.5 | 46             | 15.0 | 10.7 - 21.1 | 39               | 19.9  | 14.2 - 27.8  | 159                         | 9.9  | 8.3 - 11.7 |
| 10-14                         | 819          | 7.3  | 6.9 - 7.9   | 335                  | 9.8  | 8.8 - 10.9  | 161                 | 19.2 | 16.3 - 22.5 | 42             | 9.8  | 7.1 - 13.4  | 31               | 15.7  | 10.9 - 22.7  | 101                         | 5.1  | 4.2 - 6.3  |
| 15*                           | 121          | 5.3  | 4.4 - 6.3   | 57                   | 7.6  | 5.8 - 9.9   | 25                  | 13.8 | 9.2 - 20.7  | 10             | 9.5  | 5.0 - 18.1  | 7                | 16.4  | 7.4 - 36.3   | 16                          | 3.6  | 2.2 - 6.0  |

| Table S7. Relative rates of Other Health-Related Cause Mortality Based on Treatment Era Among Five-Year Survivors of Specific Childhood Cancers and the Impact of Specific Treatment Exposures Upon Treatment Era* |                              |             |                  |              |             |              |             |             |
|--------------------------------------------------------------------------------------------------------------------------------------------------------------------------------------------------------------------|------------------------------|-------------|------------------|--------------|-------------|--------------|-------------|-------------|
|                                                                                                                                                                                                                    | Acute Lymphoblastic Leukemia |             | Hodgkin Lymphoma |              | Wilms Tumor |              | Astrocytoma |             |
|                                                                                                                                                                                                                    | RR                           | 95%CI       | RR               | 95%CI        | RR          | 95%CI        |             |             |
| Model Without Therapy                                                                                                                                                                                              |                              |             |                  |              |             |              |             |             |
| Treatment era (per 5 years)                                                                                                                                                                                        | 0.88                         | 0.81 - 0.95 | 0.79             | 0.72 - 0.87  | 0.68        | 0.56 - 0.84  | 0.81        | 0.73 - 0.91 |
| Model With Therapy                                                                                                                                                                                                 |                              |             |                  |              |             |              |             |             |
| Treatment era (per 5 years)                                                                                                                                                                                        | 1.02                         | 0.83 - 1.24 | 0.79             | 0.70 - 0.89  | 0.80        | 0.59 - 1.08  | 0.82        | 0.72 - 0.94 |
| Cranial RT                                                                                                                                                                                                         |                              |             |                  |              |             |              |             |             |
| None                                                                                                                                                                                                               | 1.0                          |             | -                | -            | -           | -            |             |             |
| 1-19.9 Gy                                                                                                                                                                                                          | 1.02                         | 0.63 - 1.66 | -                | -            | -           | -            |             |             |
| ≥ 20 Gy                                                                                                                                                                                                            | 2.26                         | 1.44 - 3.54 | -                | -            | -           | -            |             |             |
| Cranial RT                                                                                                                                                                                                         |                              |             |                  |              |             |              |             |             |
| No                                                                                                                                                                                                                 |                              |             |                  |              |             |              | 1.0         |             |
| Yes                                                                                                                                                                                                                |                              |             |                  |              |             |              | 2.39        | 1.27 - 4.48 |
| Any Chemotherapy                                                                                                                                                                                                   |                              |             |                  |              |             |              |             |             |
| No                                                                                                                                                                                                                 |                              |             |                  |              |             |              | 1.0         |             |
| Yes                                                                                                                                                                                                                |                              |             |                  |              |             |              | 1.73        | 1.11 - 2.67 |
| Epiodophyllotoxin                                                                                                                                                                                                  |                              |             |                  |              |             |              |             |             |
| No                                                                                                                                                                                                                 | 1.0                          |             | -                | -            | -           | -            |             |             |
| Yes                                                                                                                                                                                                                | 1.83                         | 1.20 - 2.79 | -                | -            | -           | -            |             |             |
| Steroid                                                                                                                                                                                                            |                              |             |                  |              |             |              |             |             |
| None                                                                                                                                                                                                               | 1.0                          |             | -                | -            | -           | -            |             |             |
| Prednisone                                                                                                                                                                                                         | 0.39                         | 0.26 - 0.60 | -                | -            | -           | -            |             |             |
| Dexamethasone                                                                                                                                                                                                      | 0.33                         | 0.15 - 0.75 | -                | -            | -           | -            |             |             |
| Both                                                                                                                                                                                                               | 0.21                         | 0.13 - 0.35 | -                | -            | -           | -            |             |             |
| Anthracycline(mg/m <sup>2</sup> )                                                                                                                                                                                  |                              |             |                  |              |             |              |             |             |
| None                                                                                                                                                                                                               | 1.0                          |             | 1.0              |              | 1.0         |              |             |             |
| 1-<150                                                                                                                                                                                                             | 1.36                         | 0.65 - 2.84 | 1.64             | 0.66 - 4.05  | 0.12        | 0.00 - 6.29  |             |             |
| ≥150-<300                                                                                                                                                                                                          | 2.07                         | 0.97 - 4.39 | 3.26             | 2.03 - 5.25  | 1.34        | 0.54 - 3.31  |             |             |
| ≥300-<450                                                                                                                                                                                                          | 1.23                         | 0.73 - 2.08 | 2.53             | 1.23 - 5.18  | 2.05        | 0.79 - 5.28  |             |             |
| ≥450-<600                                                                                                                                                                                                          | 1.92                         | 0.71 - 5.18 | 3.11             | 0.74 - 13.08 | 24.87       | 5.90 - 104.8 |             |             |
| ≥600                                                                                                                                                                                                               | 3.09                         | 1.16 - 8.23 | 9.56             | 1.29 - 70.93 | -           | -            |             |             |
| Cyclophosphamide Equivalent Dose (mg/m <sup>2</sup> )                                                                                                                                                              |                              |             |                  |              |             |              |             |             |
| None                                                                                                                                                                                                               | -                            | -           | 1.0              |              | -           | -            |             |             |
| 0-<4000                                                                                                                                                                                                            | -                            | -           | 0.83             | 0.34 - 2.01  | -           | -            |             |             |
| ≥4000-<8000                                                                                                                                                                                                        | -                            | -           | 0.74             | 0.27 - 2.00  | -           | -            |             |             |
| ≥8000-<12000                                                                                                                                                                                                       | -                            | -           | 0.97             | 0.53 - 1.79  | -           | -            |             |             |
| ≥12000-<16000                                                                                                                                                                                                      | -                            | -           | 1.38             | 0.86 - 2.22  | -           | -            |             |             |
| ≥16000-<20000                                                                                                                                                                                                      | -                            | -           | 2.27             | 0.94 - 5.49  | -           | -            |             |             |
| ≥20000                                                                                                                                                                                                             | -                            | -           | 1.60             | 0.84 - 3.07  | -           | -            |             |             |
| Chest RT                                                                                                                                                                                                           |                              |             |                  |              |             |              |             |             |
| None                                                                                                                                                                                                               | -                            | -           |                  |              | -           | -            |             |             |
| 1-19.9 Gy                                                                                                                                                                                                          | -                            | -           | 1.00             | 0.22 - 4.43  | -           | -            |             |             |
| 20-29.9 Gy                                                                                                                                                                                                         | -                            | -           | 1.23             | 0.65 - 2.32  | -           | -            |             |             |
| ≥30 Gy                                                                                                                                                                                                             | -                            | -           | 2.60             | 1.63 - 4.15  | -           | -            |             |             |
| Splenuectomy                                                                                                                                                                                                       |                              |             |                  |              |             |              |             |             |
| No                                                                                                                                                                                                                 | -                            | -           | 1.0              |              | -           | -            |             |             |
| Yes                                                                                                                                                                                                                | -                            | -           | 1.12             | 0.83 - 1.52  | -           | -            |             |             |
| Abdomen RT dose                                                                                                                                                                                                    |                              |             |                  |              |             |              |             |             |
| None                                                                                                                                                                                                               | -                            | -           | -                | -            | 1.0         |              |             |             |
| 1-19.9 Gy                                                                                                                                                                                                          | -                            | -           | -                | -            | 0.67        | 0.06 - 6.84  |             |             |
| 20-29.9 Gy                                                                                                                                                                                                         | -                            | -           | -                | -            | 1.29        | 0.44 - 3.75  |             |             |
| ≥ 30 Gy                                                                                                                                                                                                            | -                            | -           | -                | -            | 2.60        | 0.88 - 7.70  |             |             |

\*adjusted for sex and age at diagnosis

Table S8. Cumulative incidence of all cause and cause-specific mortality at **10 years** from primary cancer diagnosis among five-year survivors

| Year of Diagnosis | All Cause   | Recurrence/Progression of Primary Disease | Health-related Cause |
|-------------------|-------------|-------------------------------------------|----------------------|
| 1970-1974         | 8.8%        | 6.3%                                      | 2.1%                 |
| 1975-1979         | 6.5%        | 4.7%                                      | 1.6%                 |
| 1980-1984         | 5.9%        | 4.1%                                      | 1.6%                 |
| 1985-1989         | 5.0%        | 3.4%                                      | 1.4%                 |
| 1990-1994         | 3.9%        | 2.7%                                      | 1.0%                 |
| <b>1995-1999</b>  | <b>3.6%</b> | <b>2.5%</b>                               | <b>0.9%</b>          |
